# Supplementary material for: Terrestrial wildlife as indicators of microplastic pollution in western Thailand
Source: PeerJ. 2024 May 20;12:e17384. doi: 10.7717/peerj.17384 (PMC11114113; doi:10.7717/peerj.17384)
Supplement: Supplemental Information 3 — The microplastic count per individual as classified by types, colors, and sizes and data based on individual carcasses with parameters used for statistical analysis. [file peerj-12-17384-s003.xlsx]

## Sheet: Sheet1
ID	Tweight	Totalanimal	Denanimal	Tweight	group	Population	No_Village	Sceince	group1	Loc	District	PA	Water	Sed	Dsed	Soil	Dsoil	Landfill	StreamO	Slope	temp	prep	Elev	LUCODE	LUEN	TLU	Landmark	Factory	Landmark2	distvill	Tourist	DvillKan	Dpopvill	DetailR	Miniroad	MinorR	MroadKan	River	RiverKan	roadD	StreamKan	KNR	streamorder	class	wscl
C02	24.3	0	0	24.3	Reptiles	0	0	Acanthosaura lepidogaster	Carcass	Inside	Thong Pha Phum	Thong Pha Phum NP	3	1	3.21543	4	5.56328	3879.71	1868.43	23.9295	23.3375	2782	873	F2	Deciduous forest	F	1607.52	13905.5	1607.52	2287.71	19731.8	2287.71	2287.71	7.23358	6.43142	6.43142	21.1801	1601.97	1601.97	6.43142	476.029	2553.96	1	1	wscl
26	206.37	3	0.014537	206.37	Birds	1064	495	Acridotheres grandis	Carcass	Outside	Sai Yok	Outside	14	3	13.5833	4	7.00366	7539.06	973.686	3.01229	27.2375	1439	124	A	Orchard	A	156.106	1621.22	156.106	272.126	16358.5	272.126	272.126	38.4621	9.04148	9.04148	6205.57	3366.54	3366.54	9.04148	115.61	4788.5	1	4	wscl non
47	90.8	1	0.0110132	90.8	Birds	423	141	Acridotheres grandis	Carcass	Outside	DM	Outside	27	6	17.7478	21	25.2392	1451	349.827	1.90979	27.8875	1068	48	U	Communication and utility	U	703.187	446.925	983.686	1999.58	11163.3	1999.58	1999.58	1.20714	3.6078	1.20714	3.63016	199.118	199.118	3.6078	146.826	249.644	3	5	wscl non
158	116.7	1	0.00856898	116.7	Reptiles	2	0	Amyda cartilaginea	Carcass	Inside	Thong Pha Phum	Sai Yok NP	10	1	2.26968	4	6.84638	16094.8	22.6364	2.1279	26.6583	2501	143	A	Field crop	A	6822.5	11993.5	9410.12	6772.68	24596.5	6772.68	6772.68	114.532	4327.65	114.532	13615.8	48.1667	48.1667	4327.65	8.78891	8.78891	1	3	wscl non
102	27.8	0	0	27.8	Birds	927	444	bird1	Carcass	Inside	Si Sawat	Salakpra WS	41	9	39.9488	7	14.62	4984.37	14092.1	1.85433	26.8167	1355	229	U	Communication and utility	U	1874.76	21776.2	1874.76	2859.06	5878.71	2859.06	2859.06	14942.9	3.80639	3.80639	3.82005	2473.12	2473.12	3.80639	866.075	22026	3	4	wscl non
63	60.3	3	0.0497512	60.3	Birds	1052	686	bird2	Carcass	Outside	DM	Outside	5	2	7.4299	10	11.89	2033.27	6271.32	0	27.6667	1147	57	U	Communication and utility	U	1024.3	7937.14	1024.3	275.56	9421.52	275.56	275.56	3048.34	10.413	10.413	10.4164	1010.5	1010.5	10.413	85.1545	12997.8	5	5	wscl non
58	15.2	0	0	15.2	Snakes	678	284	Boiga siamensis	Carcass	Inside	DM	Salakpra WS	13	2	9.13659	4	7.43633	7207.12	15537	1.33262	27.075	1275	83	F2	Deciduous forest	F	2089.64	18220.5	2428.85	100.948	5764.62	100.948	100.948	13683.1	40.5803	40.5803	40.5819	666.174	666.174	40.5803	283.45	19959.9	5	3	wscl non
156	448.4	2	0.0044603	448.4	Snakes	1286	491	Boiga siamensis	Carcass	Inside	Sai Yok	Sai Yok NP	6	1	4.4964	10	17.6585	16385.1	10.3905	1.33292	26.6333	1846	208	U	Village	U	310.275	8831.87	472.439	709.066	20208.4	709.066	709.066	55.3873	49.1996	49.1996	49.1893	1931.6	1931.6	49.1996	42.6232	1986.83	2	4	wscl non
115	625	2	0.0032	625	Mammals	1286	491	Callosciurus caniceps	Carcass	Outside	Si Sawat	Outside	21	6	23.9617	5	14.0331	1617.02	10985.3	7.21872	26.9667	1393	95	F2	Deciduous forest	F	250.468	18580.4	250.468	1044.9	2040.06	1044.9	1044.9	13811.5	2.64239	2.64239	636.476	539.583	539.583	2.64239	16.0221	18776.2	2	3	wscl non
45	12.5	1	0.08	12.5	Reptiles	927	444	Calotes versicolor	Carcass	Outside	Si Sawat	Outside	3	10	26.8764	6	14.35	4977.31	13221.9	10.0966	26.7458	1381	200	U	Communication and utility	U	211.722	20815.1	211.722	834.3	6461.81	834.3	834.3	13119.2	2.96664	2.96664	2.9917	388.529	388.529	2.96664	70.5501	20814.3	4	4	wscl non
34	1286	4	0.00311042	1286	Birds	927	444	Centropus sinensis	Carcass	Outside	Si Sawat	Outside	3	10	26.8764	6	14.35	2705.17	16388.8	3.70479	26.725	1357	238	U	Communication and utility	U	707.427	18459.1	707.427	269.559	9138.54	269.559	269.559	15557.8	5.50667	5.50667	5.37667	1956.84	1956.84	5.50667	737.919	23762.3	1	4	wscl non
55	210.5	1	0.00475059	210.5	Birds	1064	495	Centropus sinensis	Carcass	Outside	DM	Outside	46	1	2.4475	33	39.3771	3199.17	45.1348	1.85433	27.9875	1052	33	U	Communication and utility	U	1304.11	1793.69	1590.46	1077.98	4186.15	1077.98	1077.98	1.67844	1.5044	1.5044	1.44637	2257.86	2257.86	1.5044	539.296	1855.32	5	5	wscl non
C01	203.9	1	0.00490436	203.9	Birds	1093	295	Centropus sinensis	Carcass	Outside	Thong Pha Phum	Outside	103	2	5.42005	3	6.28931	8606.12	24.1459	2.66551	26.4417	2546	233	A	Perennial crop	A	387.015	9258.78	3773.63	713.119	17588.5	713.119	713.119	1.67527	8.22285	1.67527	5974.75	619.067	619.067	8.22285	38.476	38.476	2	4	wscl
46	156	1	0.00641026	156	Snakes	958	721	Chrysopelea ornata	Carcass	Outside	Si Sawat	Outside	21	6	23.9617	5	14.0331	3727.24	11393.6	3.01549	27.0417	1373	75	U	Communication and utility	U	698.325	17248	698.325	94.4532	1954.03	94.4532	94.4532	12782.6	1.62994	1.62994	1.62763	119.413	119.413	1.62994	105.188	18601.2	2	4	wscl non
C16	51	1	0.0196078	51	Snakes	1305	505	Chrysopelea ornata	Carcass	Inside	Si Sawat	Sri Nakarin NP	8	4	9.85	7	8.37	11267.9	12326.2	6.63914	26.975	1582	208	F2	Deciduous forest	F	841.644	14001.8	841.644	2658.14	2696.96	2658.14	2658.14	14111.2	1.47305	1.47305	18957.2	888.359	888.359	1.47305	146.856	11729.1	1	4	wscl
001 (1)	6.3	0	0	6.3	Tadpoles	5	1	Clinotarus penelops	Tadpole	Inside	Sai Yok	Sai Yok NP	17	6	17.0082	15	21.1772	16860	35.6445	11.2227	25.6792	2268	334	F2	Deciduous forest	F	17176.9	25080.3	17634.7	380.829	31533	380.829	380.829	17.0933	17182.1	17.0933	21259.5	292.31	292.31	17182.1	18.4038	18.4038	2	3	wscl non
001 (2)	9	1	0.111111	9	Tadpoles	5	1	Clinotarus penelops	Tadpole	Inside	Sai Yok	Sai Yok NP	17	6	17.0082	15	21.1772	16860	35.6445	11.2227	25.6792	2268	334	F2	Deciduous forest	F	17176.9	25080.3	17634.7	380.829	31533	380.829	380.829	17.0933	17182.1	17.0933	21259.5	292.31	292.31	17182.1	18.4038	18.4038	2	3	wscl non
001 (3)	8.6	1	0.116279	8.6	Tadpoles	5	1	Clinotarus penelops	Tadpole	Inside	Sai Yok	Sai Yok NP	17	6	17.0082	15	21.1772	16860	35.6445	11.2227	25.6792	2268	334	F2	Deciduous forest	F	17176.9	25080.3	17634.7	380.829	31533	380.829	380.829	17.0933	17182.1	17.0933	21259.5	292.31	292.31	17182.1	18.4038	18.4038	2	3	wscl non
001 (4)	8	0	0	8	Tadpoles	5	1	Clinotarus penelops	Tadpole	Inside	Sai Yok	Sai Yok NP	17	6	17.0082	15	21.1772	16860	35.6445	11.2227	25.6792	2268	334	F2	Deciduous forest	F	17176.9	25080.3	17634.7	380.829	31533	380.829	380.829	17.0933	17182.1	17.0933	21259.5	292.31	292.31	17182.1	18.4038	18.4038	2	3	wscl non
001 (5)	1.8	1	0.555556	1.8	Tadpoles	5	1	Clinotarus penelops	Tadpole	Inside	Sai Yok	Sai Yok NP	17	6	17.0082	15	21.1772	16860	35.6445	11.2227	25.6792	2268	334	F2	Deciduous forest	F	17176.9	25080.3	17634.7	380.829	31533	380.829	380.829	17.0933	17182.1	17.0933	21259.5	292.31	292.31	17182.1	18.4038	18.4038	2	3	wscl
129 (1)	0.6	2	3.33333	0.6	Tadpoles	1093	295	Clinotarus penelops	Tadpole	Inside	Thong Pha Phum	Thong Pha Phum NP	103	2	5.42005	3	6.28931	11464.2	28.4768	7.83792	25.9042	2594	306	F2	Deciduous forest	F	3014.78	12407.8	7959.26	2841.08	22114.4	2841.08	2841.08	13.813	2260.43	13.813	10194.2	341.671	341.671	2260.43	3.69363	3.6936	1	2	wscl non
129 (2)	0.5	0	0	0.5	Tadpoles	1093	295	Clinotarus penelops	Tadpole	Inside	Thong Pha Phum	Thong Pha Phum NP	103	2	5.42005	3	6.28931	11464.2	28.4768	7.83792	25.9042	2594	306	F2	Deciduous forest	F	3014.78	12407.8	7959.26	2841.08	22114.4	2841.08	2841.08	13.813	2260.43	13.813	10194.2	341.671	341.671	2260.43	3.69363	3.6936	1	2	wscl non
129 (3)	0.8	1	1.25	0.8	Tadpoles	1093	295	Clinotarus penelops	Tadpole	Inside	Thong Pha Phum	Thong Pha Phum NP	103	2	5.42005	3	6.28931	11464.2	28.4768	7.83792	25.9042	2594	306	F2	Deciduous forest	F	3014.78	12407.8	7959.26	2841.08	22114.4	2841.08	2841.08	13.813	2260.43	13.813	10194.2	341.671	341.671	2260.43	3.69363	3.6936	1	2	wscl non
129 (4)	0.6	2	3.33333	0.6	Tadpoles	1093	295	Clinotarus penelops	Tadpole	Inside	Thong Pha Phum	Thong Pha Phum NP	103	2	5.42005	3	6.28931	11464.2	28.4768	7.83792	25.9042	2594	306	F2	Deciduous forest	F	3014.78	12407.8	7959.26	2841.08	22114.4	2841.08	2841.08	13.813	2260.43	13.813	10194.2	341.671	341.671	2260.43	3.69363	3.6936	1	2	wscl non
129 (5)	4.5	1	0.222222	4.5	Tadpoles	1093	295	Clinotarus penelops	Tadpole	Inside	Thong Pha Phum	Thong Pha Phum NP	103	2	5.42005	3	6.28931	11464.2	28.4768	7.83792	25.9042	2594	306	F2	Deciduous forest	F	3014.78	12407.8	7959.26	2841.08	22114.4	2841.08	2841.08	13.813	2260.43	13.813	10194.2	341.671	341.671	2260.43	3.69363	3.6936	1	2	wscl non
134 (1)	2.5	0	0	2.5	Tadpoles	0	0	Clinotarus penelops	Tadpole	Inside	Thong Pha Phum	Thong Pha Phum NP	3	1	3.21543	4	5.56328	5148.9	2014.94	12.8028	24.125	2840	697	F1	Evergreen forest	F	1600.49	13832.8	1600.49	3227.43	22698.6	3227.43	3227.43	80.3814	2171.93	80.3814	2184.41	4561.28	4561.28	2171.93	35.6065	5871.82	1	1	wscl non
134 (2)	2	2	1	2	Tadpoles	0	0	Clinotarus penelops	Tadpole	Inside	Thong Pha Phum	Thong Pha Phum NP	3	1	3.21543	4	5.56328	5148.9	2014.94	12.8028	24.125	2840	697	F1	Evergreen forest	F	1600.49	13832.8	1600.49	3227.43	22698.6	3227.43	3227.43	80.3814	2171.93	80.3814	2184.41	4561.28	4561.28	2171.93	35.6065	5871.82	1	1	wscl non
134 (3)	2	1	0.5	2	Tadpoles	0	0	Clinotarus penelops	Tadpole	Inside	Thong Pha Phum	Thong Pha Phum NP	3	1	3.21543	4	5.56328	5148.9	2014.94	12.8028	24.125	2840	697	F1	Evergreen forest	F	1600.49	13832.8	1600.49	3227.43	22698.6	3227.43	3227.43	80.3814	2171.93	80.3814	2184.41	4561.28	4561.28	2171.93	35.6065	5871.82	1	1	wscl non
134 (4)	2.3	0	0	2.3	Tadpoles	0	0	Clinotarus penelops	Tadpole	Inside	Thong Pha Phum	Thong Pha Phum NP	3	1	3.21543	4	5.56328	5148.9	2014.94	12.8028	24.125	2840	697	F1	Evergreen forest	F	1600.49	13832.8	1600.49	3227.43	22698.6	3227.43	3227.43	80.3814	2171.93	80.3814	2184.41	4561.28	4561.28	2171.93	35.6065	5871.82	1	1	wscl non
134 (5)	1.2	4	3.33333	1.2	Tadpoles	0	0	Clinotarus penelops	Tadpole	Inside	Thong Pha Phum	Thong Pha Phum NP	3	1	3.21543	4	5.56328	5148.9	2014.94	12.8028	24.125	2840	697	F1	Evergreen forest	F	1600.49	13832.8	1600.49	3227.43	22698.6	3227.43	3227.43	80.3814	2171.93	80.3814	2184.41	4561.28	4561.28	2171.93	35.6065	5871.82	1	1	wscl non
134 (6)	0.3	0	0	0.3	Tadpoles	0	0	Clinotarus penelops	Tadpole	Inside	Thong Pha Phum	Thong Pha Phum NP	3	1	3.21543	4	5.56328	5148.9	2014.94	12.8028	24.125	2840	697	F1	Evergreen forest	F	1600.49	13832.8	1600.49	3227.43	22698.6	3227.43	3227.43	80.3814	2171.93	80.3814	2184.41	4561.28	4561.28	2171.93	35.6065	5871.82	1	1	wscl non
137 (4)	2.8	1	0.357143	2.8	Tadpoles	2275	818	Clinotarus penelops	Tadpole	Outside	Thong Pha Phum	Outside	3	1	3.21543	4	5.56328	6828.13	1571.46	5.32022	24.1542	2792	748	F2	Deciduous forest	F	3386.67	12198.5	3386.67	4844.52	22546.8	4844.52	4844.52	3.4463	3691.34	3.4463	3705.37	5736.63	5736.63	3691.34	796.94	6092.33	1	1	wscl
139 (1)	1.1	1	0.909091	1.1	Tadpoles	2275	818	Clinotarus penelops	Tadpole	Outside	Thong Pha Phum	Outside	12	4	11.0803	6	7.5188	4805.7	24.8884	2.66613	26.625	2630	195	U	Village	U	559.041	1534.27	687.977	891.921	13336.5	891.921	891.921	63.4367	73.4187	63.4367	73.4497	505.936	505.936	73.4187	50.4896	1279.15	1	4	wscl
139 (2)	1.3	1	0.769231	1.3	Tadpoles	2275	818	Clinotarus penelops	Tadpole	Outside	Thong Pha Phum	Outside	12	4	11.0803	6	7.5188	4805.7	24.8884	2.66613	26.625	2630	195	U	Village	U	559.041	1534.27	687.977	891.921	13336.5	891.921	891.921	63.4367	73.4187	63.4367	73.4497	505.936	505.936	73.4187	50.4896	1279.15	1	4	wscl
139 (3)	1.8	1	0.555556	1.8	Tadpoles	2275	818	Clinotarus penelops	Tadpole	Outside	Thong Pha Phum	Outside	12	4	11.0803	6	7.5188	4805.7	24.8884	2.66613	26.625	2630	195	U	Village	U	559.041	1534.27	687.977	891.921	13336.5	891.921	891.921	63.4367	73.4187	63.4367	73.4497	505.936	505.936	73.4187	50.4896	1279.15	1	4	wscl
23	4176	9	0.00215517	4176	Snakes	813	348	Coelognathus radiatus	Carcass	Outside	Sai Yok	Outside	7	3	9.09366	4	7.12631	12964.2	213.383	2.66473	27.3625	1985	83	U	Village	U	1104	1712.78	1246.7	143.586	16949.5	143.586	143.586	2.0085	15.384	2.0085	15.3767	624.362	624.362	15.384	531.515	726.445	1	4	wscl non
148	23.6	2	0.0847458	23.6	Snakes	813	348	Coelognathus radiatus	Carcass	Outside	Sai Yok	Outside	7	1	3.37382	11	16.0537	13032.3	165.18	1.33304	27.3292	1989	83	A	Orchard	A	649.247	3005.86	835.943	805.438	18222.9	805.438	805.438	3.88834	6.21197	3.88834	645.962	608.97	608.97	6.21197	42.1609	697.884	1	5	wscl non
152	2789	10	0.00358551	2789	Snakes	5420	2054	Coelognathus radiatus	Carcass	Inside	Sai Yok	Sai Yok NP	18	10	25.8238	4	5.69217	3117.44	692.067	11.3436	27.125	1521	157	U	Communication and utility	U	720.599	333.666	720.599	388.18	115.937	388.18	388.18	10.2768	1.47932	1.47932	84.9889	1859.94	1859.94	1.47932	234.415	1905.96	5	3	wscl non
C11	570.6	9	0.0157729	570.6	Snakes	613	230	Coelognathus radiatus	Carcass	Outside	Thong Pha Phum	Outside	14	5	18.7836	5	9.95718	5241.54	208.776	4.72806	26.5917	2362	167	A	Orchard	A	2608.29	5327.73	2608.29	2692.04	5927.32	2692.04	2692.04	16.126	2.73791	2.73791	2.7191	166.286	166.286	2.73791	189.319	189.319	3	3	wscl non
C36	458	0	0	458	Snakes	2311	920	Coelognathus radiatus	Carcass	Outside	Thong Pha Phum	Outside	6	9	25.6783	7	9.33582	3482.46	621.663	5.6288	27.3042	2273	109	U	Communication and utility	U	136.249	138.318	136.249	1908.18	2655.5	1908.18	1908.18	3.48134	3.53862	3.48134	3.53932	831.262	831.262	3.53862	394.817	394.817	5	4	wscl non
C38	253.5	1	0.00394477	253.5	Snakes	1762	613	Coelognathus radiatus	Carcass	Outside	Sai Yok	Outside	10	7	22.3093	5	6.10217	6130.57	69.2123	2.66296	27.3708	1363	109	U	Communication and utility	U	553.71	731.222	553.71	740.699	10090.5	740.699	740.699	4.3625	0.248918	0.248918	0.256155	3506.02	3506.02	0.248918	467.356	3421.78	1	4	wscl non
40	453.7	13	0.0286533	453.7	Birds	299	130	Copsychus saularis	Carcass	Outside	Sai Yok	Outside	14	3	13.5833	4	7.00366	6979.79	479.494	2.8663	27.35	1418	92	U	Communication and utility	U	313.988	2309.01	313.988	777.874	15622.2	777.874	777.874	5.87205	45.5012	5.87205	5976.51	3321.95	3321.95	45.5012	200.579	4656.94	1	5	wscl non
89	122.7	0	0	122.7	Birds	766	478	Coracias benghalensis	Carcass	Outside	Si Sawat	Outside	42	17	64.4183	11	23.8457	6639.6	13281.1	4.72285	27.1208	1334	74	U	Communication and utility	U	509.48	17674.6	703.189	180.808	4812.86	180.808	180.808	13032.6	8.64275	8.64275	8.6077	138.933	138.933	8.64275	135.826	19733.8	4	3	wscl non
65	92.1	3	0.0325733	92.1	Snakes	1968	713	Daboia siamensis	Carcass	Outside	DM	Outside	5	2	7.4299	10	11.89	2800.64	6764.53	2.12514	27.675	1154	65	A	Orchard	A	277.657	8188.48	277.657	675.282	8654.99	675.282	675.282	3379.74	3.14477	3.14477	3.12654	780.148	780.148	3.14477	672.315	12970.5	5	4	wscl non
3	324.5	11	0.0338983	324.5	Snakes	963	287	Dendrelaphis spp.	Carcass	Outside	Sai Yok	Outside	8	4	8.50991	12	15.1031	1846.97	80.6716	14.4965	25.7875	1686	307	F2	Deciduous forest	F	705.624	10202	10815	736.842	21603.9	736.842	736.842	18.4084	5970.97	18.4084	18028.8	6166.91	6166.91	5970.97	58.9578	3736.33	1	1	wscl
52	116.8	2	0.0171233	116.8	Snakes	1052	686	Dendrelaphis spp.	Carcass	Inside	DM	Salakpra WS	2	2	6.54172	8	9.97133	597.758	5438.43	2.08616	27.7042	1130	63	A	Field crop	A	1108.75	7117.83	1160.43	712.291	8843.47	712.291	712.291	3254.97	7.34366	7.34366	7.34235	1007.51	1007.51	7.34366	386.509	13543.6	5	5	wscl non
C12	306.6	7	0.0228311	306.6	Snakes	2311	920	Dendrelaphis spp.	Carcass	Outside	Thong Pha Phum	Outside	6	9	25.6783	7	9.33582	4994.06	169.544	5.52651	27.3292	2255	97	F2	Deciduous forest	F	637.743	944.776	1264.68	1014.08	4128.06	1014.08	1014.08	7.15629	14.5548	7.15629	14.5806	104.249	104.249	14.5548	102.145	102.145	5	4	wscl non
149	15.8	1	0.0632911	15.8	Snakes	813	348	Dryocalamus davidsonii	Carcass	Outside	Sai Yok	Outside	7	1	3.37382	11	16.0537	13181	114.471	1.33305	27.3292	1989	84	A	Orchard	A	501.54	2973.03	687.664	671.729	18080.6	671.729	671.729	1.72087	1.30958	1.30958	498.955	754.187	754.187	1.30958	94.6838	813.509	1	5	wscl non
153	14.7	1	0.0680272	14.7	Snakes	1286	491	Dryocalamus davidsonii	Carcass	Outside	Sai Yok	Outside	7	1	3.37382	11	16.0537	14976.7	667.49	2.9401	27.0208	1898	184	A	Orchard	A	1123.85	6379.43	1123.85	1628.94	19059.7	1628.94	1628.94	7.38269	18.5769	7.38269	18.5654	849.8	849.8	18.5769	582.052	639.563	1	4	wscl non
C07	43	2	0.0465116	43	Snakes	0	0	Dryocalamus davidsonii	Carcass	Inside	Thong Pha Phum	Thong Pha Phum NP	3	1	3.21543	4	5.56328	5325.41	2305.35	18.2174	23.6292	2753	915	F2	Deciduous forest	F	2738.06	12433	2738.06	3760.72	18740.5	3760.72	3760.72	2.26583	3.34792	2.26583	9.71922	1954.75	1954.75	3.34792	1556.67	2261.41	1	1	wscl non
13	467.5	0	0	467.5	Amphibians	988	490	Duttaphrynus melanostictus	Carcass	Outside	Sai Yok	Outside	154	3	8.14708	4	4.60946	2277.24	1045.48	3.93041	26.8375	1331	253	U	Institutional land	U	172.482	3902.31	255.024	1335.32	11319.5	1335.32	1335.32	3.75673	3.86154	3.75673	3.86445	2607.94	2607.94	3.86154	2494.81	2494.81	1	4	wscl non
27	206.4	4	0.0193798	206.4	Amphibians	1847	442	Duttaphrynus melanostictus	Carcass	Outside	Sai Yok	Outside	14	3	13.5833	4	7.00366	6997.75	967.103	12.6627	26.7542	1505	171	U	Communication and utility	U	2774.19	2705.79	3265.56	448.152	15351.9	448.152	448.152	12.8223	0.854405	0.854405	9841.14	5830.62	5830.62	0.854405	149.864	4924.68	1	4	wscl non
48	83.1	1	0.0120337	83.1	Amphibians	423	141	Duttaphrynus melanostictus	Carcass	Outside	DM	Outside	27	6	17.7478	21	25.2392	1451	349.827	1.90979	27.8875	1068	48	U	Communication and utility	U	703.187	446.925	983.686	1999.58	11163.3	1999.58	1999.58	1.20714	3.6078	1.20714	3.63016	199.118	199.118	3.6078	146.826	249.644	3	5	wscl non
169(1)	0.1	1	10	0.1	Tadpoles	642	122	Duttaphrynus melanostictus	Tadpole	Inside	Sangkhla Buri	Thung Yai WS	6	13	11.7683	8	9.92544	21363.3	17.3492	3.02745	25.8875	2294	241	F2	Deciduous forest	F	1120.91	11481	1120.91	3755.97	6709.6	3755.97	3755.97	1267.8	1501.53	1267.8	4231.12	17901.2	17901.2	1501.53	9.85977	12541	1	3	wscl
169(2)	0.1	0	0	0.1	Tadpoles	642	122	Duttaphrynus melanostictus	Tadpole	Inside	Sangkhla Buri	Thung Yai WS	6	13	11.7683	8	9.92544	21363.3	17.3492	3.02745	25.8875	2294	241	F2	Deciduous forest	F	1120.91	11481	1120.91	3755.97	6709.6	3755.97	3755.97	1267.8	1501.53	1267.8	4231.12	17901.2	17901.2	1501.53	9.85977	12541	1	3	wscl
169(3)	0.1	3	30	0.1	Tadpoles	642	122	Duttaphrynus melanostictus	Tadpole	Inside	Sangkhla Buri	Thung Yai WS	6	13	11.7683	8	9.92544	21363.3	17.3492	3.02745	25.8875	2294	241	F2	Deciduous forest	F	1120.91	11481	1120.91	3755.97	6709.6	3755.97	3755.97	1267.8	1501.53	1267.8	4231.12	17901.2	17901.2	1501.53	9.85977	12541	1	3	wscl
C27	54.5	0	0	54.5	Amphibians	739	281	Duttaphrynus melanostictus	Carcass	Inside	Thong Pha Phum	Khao Lam NP	21	1	3.59712	8	13.6519	7778.91	1175.64	7.34812	26.7333	2419	199	A	Perennial crop	A	647.167	7441.37	647.167	1564.59	10606.6	1564.59	1564.59	6.15865	13.3945	6.15865	13.4276	731.012	731.012	13.3945	929.84	1040.62	2	4	wscl non
010(cc)	88	22	0.25	88	Amphibians	687	300	Fejervarya limnocharis	Carcass	Outside	Sai Yok	Outside	154	3	8.14708	4	4.60946	1217.95	70.7118	11.9202	27.5958	1315	43	U	Communication and utility	U	287.89	1266.43	287.89	1291.92	12754.8	1291.92	1291.92	4.80696	4.51964	4.51964	684.667	179.874	179.874	4.51964	57.9201	57.9201	1	5	wscl
081 (1)	0.1	0	0	0.1	Tadpoles	0	0	Fejervarya limnocharis	Tadpole	Inside	Si Sawat	Salakpra WS	12	7	26.8296	5	9.5	13728.8	24678.5	2.66428	26.4583	1216	258	F2	Deciduous forest	F	10911.5	28792.2	10911.5	9100.7	5301.31	9100.7	9100.7	24133.2	10872	10872	10872	11058.2	11058.2	10102.8	372.398	30746.7	1	3	wscl non
081 (2)	0.2	0	0	0.2	Tadpoles	0	0	Fejervarya limnocharis	Tadpole	Inside	Si Sawat	Salakpra WS	12	7	26.8296	5	9.5	13728.8	24678.5	2.66428	26.4583	1216	258	F2	Deciduous forest	F	10911.5	28792.2	10911.5	9100.7	5301.31	9100.7	9100.7	24133.2	10872	10872	10872	11058.2	11058.2	10102.8	372.398	30746.7	1	3	wscl non
081 (3)	0.2	0	0	0.2	Tadpoles	0	0	Fejervarya limnocharis	Tadpole	Inside	Si Sawat	Salakpra WS	12	7	26.8296	5	9.5	13728.8	24678.5	2.66428	26.4583	1216	258	F2	Deciduous forest	F	10911.5	28792.2	10911.5	9100.7	5301.31	9100.7	9100.7	24133.2	10872	10872	10872	11058.2	11058.2	10102.8	372.398	30746.7	1	3	wscl non
KN1	0.2	9	45	0.2	Tadpoles	1052	1245	Fejervarya limnocharis	Tadpole	Outside	Sai Yok	Outside	43	13	43.7342	3	3.81466	5771.07	420.788	1.91082	27.6375	1241	75	A	Field crop	A	757.235	6882.15	757.235	990.308	8644.28	990.308	990.308	16.0692	16.0183	16.0183	5716.64	4549.11	4549.11	16.0183	223.915	5013.66	1	4	wscl non
KN2	0.1	17	170	0.1	Tadpoles	1052	1245	Fejervarya limnocharis	Tadpole	Outside	Sai Yok	Outside	43	13	43.7342	3	3.81466	5771.07	420.788	1.91082	27.6375	1241	75	A	Field crop	A	757.235	6882.15	757.235	990.308	8644.28	990.308	990.308	16.0692	16.0183	16.0183	5716.64	4549.11	4549.11	16.0183	223.915	5013.66	1	4	wscl non
KN3	0.1	9	90	0.1	Tadpoles	1052	1245	Fejervarya limnocharis	Tadpole	Outside	Sai Yok	Outside	43	13	43.7342	3	3.81466	5771.07	420.788	1.91082	27.6375	1241	75	A	Field crop	A	757.235	6882.15	757.235	990.308	8644.28	990.308	990.308	16.0692	16.0183	16.0183	5716.64	4549.11	4549.11	16.0183	223.915	5013.66	1	4	wscl non
KN4	0.1	6	60	0.1	Tadpoles	1052	1245	Fejervarya limnocharis	Tadpole	Outside	Sai Yok	Outside	43	13	43.7342	3	3.81466	5771.07	420.788	1.91082	27.6375	1241	75	A	Field crop	A	757.235	6882.15	757.235	990.308	8644.28	990.308	990.308	16.0692	16.0183	16.0183	5716.64	4549.11	4549.11	16.0183	223.915	5013.66	1	4	wscl non
KN5	0.1	1	10	0.1	Tadpoles	1052	1245	Fejervarya limnocharis	Tadpole	Outside	Sai Yok	Outside	43	13	43.7342	3	3.81466	5771.07	420.788	1.91082	27.6375	1241	75	A	Field crop	A	757.235	6882.15	757.235	990.308	8644.28	990.308	990.308	16.0692	16.0183	16.0183	5716.64	4549.11	4549.11	16.0183	223.915	5013.66	1	4	wscl non
32	137.1	3	0.0218818	137.1	Reptiles	927	444	Gekko gecko	Carcass	Inside	Si Sawat	Salakpra WS	51	11	47.9423	7	14.92	4966.57	13484.8	5.54754	26.7458	1381	202	U	Communication and utility	U	421.373	20981	421.373	1313.43	6319.28	1313.43	1313.43	13613.6	1.93072	1.93072	1.93648	923.352	923.352	1.93072	87.3994	21203	4	4	wscl non
C20	137.1	3	0.0218818	137.1	Reptiles	502	196	Gekko gecko	Carcass	Inside	Si Sawat	Sri Nakarin NP	8	4	9.85	7	8.37	12960.1	12206.6	1.91648	26.6833	1579	248	F2	Deciduous forest	F	253.047	14844.7	253.047	1390.13	946.367	1390.13	1390.13	12992.6	7.90906	7.90906	20032.4	1397.36	1397.36	7.90906	237.145	12357.3	2	2	wscl non
039(2)	109.9	1	0.00909918	109.9	Birds	250	109	Glaucidium cuculoides	Carcass	Outside	Si Sawat	Outside	4	2	5.61167	8	10.4058	8019.96	24001.1	8.60814	26.7167	1342	208	U	Communication and utility	U	1165.45	8699.13	1165.45	2174.63	14135.1	2174.63	2174.63	22217.4	4.54765	4.54765	4.54449	707.797	707.797	4.54765	807.1	27498.7	2	3	wscl
15	31.8	1	0.0314465	31.8	Amphibians	1365	496	Hoplobatrachus rugulosus	Carcass	Outside	Sai Yok	Outside	10	7	22.3093	5	6.10217	4829.15	660.856	1.33223	27.4708	1385	87	U	Communication and utility	U	1872.77	2082.34	1872.77	1372.96	8809.18	1372.96	1372.96	11.6936	10.7108	10.7108	10.6776	3533.92	3533.92	10.7108	160.554	3622.9	1	5	wscl non
C39	49.6	2	0.0403226	49.6	Snakes	687	300	Hypsiscopus plumbea	Carcass	Outside	Sai Yok	Outside	154	3	8.14708	4	4.60946	1577.9	637.488	7.33754	27.3375	1312	59	U	City, Town, Commercial	U	105.109	1726.08	136.209	1580.11	13373.1	1580.11	1580.11	0.667903	5.87247	0.667903	5.89287	722.148	722.148	5.87247	447.589	447.589	1	5	wscl non
154	26.6	0	0	26.6	Amphibians	1141	456	Kaloula pulchra	Carcass	Outside	Sai Yok	Outside	18	10	25.8238	4	5.69217	4398.27	1808.06	1.91314	26.875	1533	202	U	Communication and utility	U	132.137	1528.55	133.308	1240.87	1175.06	1240.87	1240.87	3.42658	0.844475	0.844475	3.42923	1689.82	1689.82	0.844475	343.327	1774.79	1	4	wscl non
C34	238.8	6	0.0251256	238.8	Amphibians	932	404	Kaloula pulchra	Carcass	Inside	Thong Pha Phum	Khao Lam NP	14	5	18.7836	5	9.95718	6274.78	429.5	5.80781	26.8125	2410	191	U	Communication and utility	U	2995.53	5537.2	3258.7	3109.99	6285.01	3109.99	3109.99	1.21309	6.0197	1.21309	6.01923	18.6775	18.6775	6.0197	428.826	428.826	3	4	wscl non
137 (1)	3.9	0	0	3.9	Tadpoles	2275	818	Leptobrachium sp.	Tadpole	Outside	Thong Pha Phum	Outside	3	1	3.21543	4	5.56328	6828.13	1571.46	5.32022	24.1542	2792	748	F2	Deciduous forest	F	3386.67	12198.5	3386.67	4844.52	22546.8	4844.52	4844.52	3.4463	3691.34	3.4463	3705.37	5736.63	5736.63	3691.34	796.94	6092.33	1	1	wscl
137 (2)	3.6	1	0.277778	3.6	Tadpoles	2275	818	Leptobrachium sp.	Tadpole	Outside	Thong Pha Phum	Outside	3	1	3.21543	4	5.56328	6828.13	1571.46	5.32022	24.1542	2792	748	F2	Deciduous forest	F	3386.67	12198.5	3386.67	4844.52	22546.8	4844.52	4844.52	3.4463	3691.34	3.4463	3705.37	5736.63	5736.63	3691.34	796.94	6092.33	1	1	wscl
137 (3)	3.7	3	0.810811	3.7	Tadpoles	2275	818	Leptobrachium sp.	Tadpole	Outside	Thong Pha Phum	Outside	3	1	3.21543	4	5.56328	6828.13	1571.46	5.32022	24.1542	2792	748	F2	Deciduous forest	F	3386.67	12198.5	3386.67	4844.52	22546.8	4844.52	4844.52	3.4463	3691.34	3.4463	3705.37	5736.63	5736.63	3691.34	796.94	6092.33	1	1	wscl
36	24.2	2	0.0826446	24.2	Snakes	482	153	Lycodon capucinus	Carcass	Outside	Si Sawat	Outside	3	10	26.8764	6	14.35	1810.75	20305.7	3.99362	26.8125	1339	212	U	Communication and utility	U	616.686	15251.4	616.686	1220.1	13242.3	1220.1	1220.1	18798.8	2.77841	2.77841	2.76173	588.388	588.388	2.77841	163.112	27480	3	4	wscl non
C32	78.6	3	0.0381679	78.6	Snakes	1319	522	Lycodon capucinus	Carcass	Inside	Thong Pha Phum	Khao Lam NP	9	2	7.42115	10	14.3062	1313.12	1.5168	2.66593	26.6125	2667	171	U	Communication and utility	U	68.7649	158.326	99.2102	286.163	14420.6	286.163	286.163	0.98029	1.37471	0.98029	1.36518	231.764	231.764	1.37471	304.402	304.402	3	4	wscl non
009 (1)	0.1	3	30	0.1	Tadpoles	687	300	Microhyla berdmorei	Carcass	Outside	Sai Yok	Outside	154	3	8.14708	4	4.60946	1214.9	73.5564	11.9202	27.5958	1315	43	U	Communication and utility	U	285.9	1269.14	285.9	1289.39	12753.1	1289.39	1289.39	2.04102	7.32328	2.04102	684.694	180.045	180.045	7.32328	56.5109	56.5109	1	5	wscl non
009 (2)	0.1	4	40	0.1	Tadpoles	687	300	Microhyla berdmorei	Carcass	Outside	Sai Yok	Outside	154	3	8.14708	4	4.60946	1214.9	73.5564	11.9202	27.5958	1315	43	U	Communication and utility	U	285.9	1269.14	285.9	1289.39	12753.1	1289.39	1289.39	2.04102	7.32328	2.04102	684.694	180.045	180.045	7.32328	56.5109	56.5109	1	5	wscl non
010 (1)	0.1	1	10	0.1	Tadpoles	934	387	Microhyla berdmorei	Tadpole	Outside	Sai Yok	Outside	14	3	9.85772	9	12.7293	17768.7	28.6328	6.73132	26.5958	1923	156	F2	Deciduous forest	F	4677.92	18041.8	10528.6	5344.4	17970.2	5344.4	5344.4	714.763	4712.86	714.763	12717.1	404.379	404.379	4712.86	12.7518	154.641	1	4	wscl non
010 (2)	0.1	4	20	0.1	Tadpoles	934	387	Microhyla berdmorei	Tadpole	Outside	Sai Yok	Outside	14	3	9.85772	9	12.7293	17768.7	28.6328	6.73132	26.5958	1923	156	F2	Deciduous forest	F	4677.92	18041.8	10528.6	5344.4	17970.2	5344.4	5344.4	714.763	4712.86	714.763	12717.1	404.379	404.379	4712.86	12.7518	154.641	1	4	wscl non
010 (3)	0.1	1	40	0.1	Tadpoles	934	387	Microhyla berdmorei	Tadpole	Outside	Sai Yok	Outside	14	3	9.85772	9	12.7293	17768.7	28.6328	6.73132	26.5958	1923	156	F2	Deciduous forest	F	4677.92	18041.8	10528.6	5344.4	17970.2	5344.4	5344.4	714.763	4712.86	714.763	12717.1	404.379	404.379	4712.86	12.7518	154.641	1	4	wscl non
C41	236.4	2	0.00846024	236.4	Mammals	5	1	Mouse	Carcass	Inside	Sai Yok	Sai Yok NP	17	6	17.0082	15	21.1772	16871.3	59.9258	12.7571	25.55	2227	340	F2	Deciduous forest	F	16791.9	24854.8	17263.7	704.532	31077.9	704.532	704.532	9.70202	16800.2	9.70202	20903.6	162.374	162.374	16800.2	16.4558	16.4558	2	3	wscl
53	477.9	9	0.0188324	477.9	Snakes	602	287	Oligodon spp.	Carcass	Inside	DM	Salakpra WS	2	2	6.54172	8	9.97133	1583.56	5350.5	0.92741	27.7833	1125	72	A	Rangeland	A	1075.84	6927.11	1075.84	1763.57	7666.83	1763.57	1763.57	3636.45	9.7892	9.7892	9.82648	1027.9	1027.9	9.7892	626.984	13973.3	5	4	wscl non
C37	72.7	1	0.0137552	72.7	Snakes	2311	920	Oligodon spp.	Carcass	Outside	Thong Pha Phum	Outside	6	9	25.6783	7	9.33582	3482.46	621.663	5.6288	27.3042	2273	109	U	Communication and utility	U	136.249	138.318	136.249	1908.18	2655.5	1908.18	1908.18	3.48134	3.53862	3.48134	3.53932	831.262	831.262	3.53862	394.817	394.817	5	4	wscl non
C40	33.9	0	0	33.9	Snakes	5	1	Oligodon spp.	Carcass	Inside	Sai Yok	Sai Yok NP	17	6	17.0082	15	21.1772	16860	35.6445	11.2227	25.6792	2268	334	F2	Deciduous forest	F	17176.9	25080.3	17634.7	380.829	31533	380.829	380.829	17.0933	17182.1	17.0933	21259.5	292.31	292.31	17182.1	18.4038	18.4038	2	3	wscl non
C42	132.3	3	0.0226757	132.3	Snakes	5	1	Oligodon spp.	Carcass	Inside	Sai Yok	Sai Yok NP	17	6	17.0082	15	21.1772	17349.6	4.77075	2.08638	25.5875	2237	338	F2	Deciduous forest	F	16813.5	25120	17313.4	929.734	30661	929.734	929.734	60.5092	16828.3	60.5092	20979.5	35.1036	35.1036	16828.3	1.46082	1.46088	1	3	wscl non
64	7.9	1	0.126582	7.9	Snakes	1052	686	Oligodon taeniatus	Carcass	Outside	DM	Outside	5	2	7.4299	10	11.89	1427.52	5968.78	2.08617	27.6333	1135	60	U	Communication and utility	U	800.674	7691.67	1635.28	581.316	10041.7	581.316	581.316	2940.38	0.314524	0.314524	0.345687	1071.61	1071.61	0.314524	94.0773	13119.5	5	5	wscl non
C35	32.5	1	0.0307692	32.5	Snakes	655	4	Ophiophagus hannah	Carcass	Outside	Thong Pha Phum	Outside	14	5	18.7836	5	9.95718	3861.39	1638.93	5.32186	26.6667	2292	236	U	Communication and utility	U	1115.87	6302.13	1115.87	1985.47	6715.28	1985.47	1985.47	7.02655	31.7125	7.02655	31.7371	1099.25	1099.25	31.7125	1200.51	1200.51	5	3	wscl non
8	62.4	6	0.0961538	62.4	Snakes	687	300	Pareas carinatus	Carcass	Outside	Sai Yok	Outside	154	3	8.14708	4	4.60946	697.139	316.855	6.23629	27.05	1314	192	U	Communication and utility	U	740.637	2550.85	740.637	1166.42	12477.6	1166.42	1166.42	4.34596	2.3803	2.3803	2.35623	1120.03	1120.03	2.3803	1045.39	1045.39	1	3	wscl non
25	51.1	7	0.136986	51.1	Snakes	687	300	Pareas carinatus	Carcass	Outside	Sai Yok	Outside	154	3	8.14708	4	4.60946	1217.83	560.481	2.66262	27.05	1314	214	U	Institutional land	U	697.527	2738.27	697.527	1676.76	12458	1676.76	1676.76	65.657	64.8978	64.8978	64.8851	1408.97	1408.97	64.8978	1298.24	1298.24	1	3	wscl non
39	18.4	10	0.543478	18.4	Snakes	1064	495	Pareas carinatus	Carcass	Outside	Sai Yok	Outside	14	3	13.5833	4	7.00366	5720.89	170.097	2.08602	27.3667	1374	80	U	Communication and utility	U	1211.4	2375.3	1211.4	1470.5	14281.6	1470.5	1470.5	1.02433	5.37369	1.02433	4923.59	2658.79	2658.79	5.37369	57.7084	3582.69	1	4	wscl non
95	78	0	0	78	Snakes	927	444	Pareas carinatus	Carcass	Outside	Si Sawat	Outside	3	10	26.8764	6	14.35	2093.55	17149.8	3.70479	26.7	1347	238	U	Institutional land	U	160.411	18660.9	455.993	174.744	9392.52	174.744	174.744	16625.6	6.52907	6.52907	6.6036	1712.44	1712.44	6.52907	149.06	24707.5	1	4	wscl non
101	9.2	3	0.326087	9.2	Snakes	876	303	Pareas carinatus	Carcass	Outside	Si Sawat	Outside	3	10	26.8764	6	14.35	6543.97	23583.7	6.92468	26.6875	1357	235	U	Communication and utility	U	279.572	11003.5	279.572	284.515	15116.3	284.515	284.515	21571.8	0.843642	0.843642	0.84804	995.541	995.541	0.843642	621	28639.6	1	4	wscl non
116	42	0	0	42	Snakes	766	478	Pareas carinatus	Carcass	Inside	DM	Salakpra WS	13	2	9.13659	4	7.43633	7629	15521.9	2.86933	27.075	1275	74	U	Institutional land	U	2509.37	18320.5	2851.44	513.183	5621.32	513.183	513.183	13732	214.683	214.683	214.639	800.918	800.918	214.683	25.9913	20115.6	5	4	wscl non
028(2)	9.5	2	0.210526	9.5	Snakes	766	478	Pareas carinatus	Carcass	Outside	Si Sawat	Outside	21	6	23.9617	5	14.0331	5653.08	12761.3	18.8584	27.0542	1343	77	U	Communication and utility	U	1365.94	17685.6	1684.83	836.524	3873.91	836.524	836.524	13085.1	22.8221	22.8221	22.848	99.7326	99.7326	22.8221	2.11417	19666.8	2	1	wscl
C04	37	2	0.0540541	37	Snakes	0	0	Pareas carinatus	Carcass	Inside	Thong Pha Phum	Thongphaphum NP.	11	4	10.6952	7	10.7099	3765.27	1823.79	37.1388	23.3375	2782	884	F2	Deciduous forest	F	1602.53	14038.4	1602.53	2135.23	19889.9	2135.23	2135.23	6.5636	0.823249	0.823249	18.6359	1599.69	1599.69	0.823249	393.576	2654.44	1	1	wscl
C13	520	5	0.00961538	520	Snakes	1428	549	Pareas carinatus	Carcass	Outside	Thong Pha Phum	Outside	6	3	12.3762	9	12.5031	13181.9	269.921	5.52689	24.4708	1798	657	A	Mine, Pit	U	3518.84	12325.6	4130.87	3837.89	19884.9	3837.89	3837.89	9.29145	1701.42	9.29145	15904.2	7223.95	7223.95	1701.42	27.6869	5013.59	1	3	wscl
C15	152	2	0.0131579	152	Snakes	502	196	Pareas carinatus	Carcass	Inside	Si Sawat	Sri Nakarin NP	8	4	9.85	7	8.37	13619	12730.1	0.958537	26.5958	1576	249	F2	Deciduous forest	F	499.009	14708.4	499.009	714.601	826.434	714.601	714.601	13106.4	275.532	275.532	19993.7	1358.75	1358.75	275.532	250.032	13046.4	1	3	wscl non
C17	33	2	0.0606061	33	Snakes	534	226	Pareas carinatus	Carcass	Inside	Si Sawat	Erawan NP	6	6	11.4388	15	18.0721	5706.95	6690.11	10.0309	26.3333	1555	298	F2	Deciduous forest	F	3243.69	18563	3573.53	1938.44	14263.7	1938.44	1938.44	6574.94	13.4976	13.4976	12464.1	1379.44	1379.44	13.4976	296.787	15132.8	1	2	wscl non
C23	113.4	2	0.0176367	113.4	Snakes	534	226	Pareas carinatus	Carcass	Inside	Si Sawat	Erawan NP	21	6	23.9617	5	14.0331	10223.9	5949.98	12.1876	25.1	1559	431	F2	Deciduous forest	F	1553.93	20570.2	1553.93	3193.85	13670.8	3193.85	3193.85	3563.97	22.939	22.939	10610.3	3902.29	3902.29	22.939	97.7444	12912.5	3	3	wscl non
C33	27.9	9	0.322581	27.9	Snakes	2275	818	Pareas carinatus	Carcass	Outside	Thong Pha Phum	Outside	7	2	7.02988	10	15.2207	3478.86	1136.25	1.85433	26.5375	2612	212	U	Communication and utility	U	1635.99	1449.71	1635.99	2222.91	13518.9	2222.91	2222.91	3.29847	1.0421	1.0421	1.04126	799.759	799.759	1.0421	114.692	2038.13	1	3	wscl non
C03	57	6	0.105263	57	Snakes	0	0	Pareas margaritophorus	Carcass	Inside	Thong Pha Phum	Thong Pha Phum NP	3	1	3.21543	4	5.56328	5594.35	2126.5	20.4402	23.6292	2753	936	F2	Deciduous forest	F	3134.79	12221	3134.79	3909.07	19014.9	3909.07	3909.07	5.82983	2.75464	2.75464	9.34328	2435.35	2435.35	2.75464	1444.65	2746.05	1	1	wscl
C18	19.4	2	0.103093	19.4	Snakes	534	226	Pareas margaritophorus	Carcass	Inside	Si Sawat	Erawan NP	6	6	11.4388	15	18.0721	8797.34	6252.69	10.0305	25.9458	1545	324	F2	Deciduous forest	F	616.882	20162.4	784.426	2641.42	14583.3	2641.42	2641.42	4891.09	13.7474	13.7474	10786.2	3294.89	3294.89	13.7474	171.174	14135.1	1	3	wscl non
C28	34.8	3	0.0862069	34.8	Snakes	739	281	Pareas margaritophorus	Carcass	Outside	Thong Pha Phum	Outside	21	1	3.59712	8	13.6519	6589.17	197.667	8.34282	26.8792	2504	161	U	Communication and utility	U	1516.78	6292.58	1584.48	785.046	11258.7	785.046	785.046	4.85422	1.68121	1.68121	1.65982	45.4343	45.4343	1.68121	10.414	475.875	2	4	wscl non
C31	26.4	2	0.0757576	26.4	Snakes	1319	522	Pareas margaritophorus	Carcass	Outside	Thong Pha Phum	Outside	21	1	3.59712	8	13.6519	1492.97	519.234	7.61844	26.6458	2621	192	U	Communication and utility	U	1259.93	1219.9	1259.93	1074.85	14095.4	1074.85	1074.85	7.35375	2.22101	2.22101	2.23943	336.682	336.682	2.22101	208.135	460.69	3	3	wscl non
C19	81	5	0.0617284	81	Birds	518	353	Passer montanus	Carcass	Inside	Si Sawat	Sri Nakarin NP	6	6	11.4388	15	18.0721	4585.81	10418.8	5.99451	26.775	1632	249	A	Field crop	A	426.466	16467.4	572.42	607.035	4091.58	607.035	607.035	10084.5	24.4525	24.4525	15319.7	3733.26	3733.26	24.4525	439.911	7905.71	1	4	wscl non
C21	11.6	2	0.172414	11.6	Birds	1305	505	Phylloscopus inornatus	Carcass	Inside	Si Sawat	Sri Nakarin NP	8	4	9.85	7	8.37	6097.17	11136.2	3.01808	26.7	1615	258	F2	Deciduous forest	F	716.444	15765	883.994	1089.27	3119.25	1089.27	1089.27	11386.3	5.88305	5.88305	16088.5	3706.53	3706.53	5.88305	607.481	8268.72	1	4	wscl non
C05	58	2	0.0344828	58	Snakes	0	0	Plagiopholis nuchalis	Carcass	Inside	Thong Pha Phum	Thong Pha Phum NP	3	1	3.21543	4	5.56328	3765.27	1823.79	37.1388	23.3375	2782	884	F2	Deciduous forest	F	1602.53	14038.4	1602.53	2135.23	19889.9	2135.23	2135.23	6.5636	0.823249	0.823249	18.6359	1599.69	1599.69	0.823249	393.576	2654.44	1	1	wscl
155	690	4	0.0057971	690	Snakes	813	348	Ptyas mucosa	Carcass	Outside	Sai Yok	Outside	7	1	3.37382	11	16.0537	13686.1	313.11	0	27.2875	1963	102	U	Village	U	191.625	3634.6	191.625	211.431	18046.8	211.431	211.431	1.64232	17.0908	1.64232	17.0808	1403.96	1403.96	17.0908	355.474	1511.76	1	5	wscl non
11	236.8	2	0.00844595	236.8	Snakes	1064	495	Ptyas spp.	Carcass	Outside	Sai Yok	Outside	14	3	13.5833	4	7.00366	4483.65	407.725	3.37245	27.55	1347	69	U	Communication and utility	U	626.446	2324.27	857.785	886.408	13134.1	886.408	886.408	2.87567	11.0346	2.87567	3946.77	2390.5	2390.5	11.0346	238.017	2634.1	5	5	wscl non
37	214.5	1	0.004662	214.5	Snakes	511	222	Ptyas spp.	Carcass	Outside	Sai Yok	Outside	14	3	13.5833	4	7.00366	4346.28	183.977	2.08602	27.55	1347	66	U	Communication and utility	U	458.158	2458.8	564.595	972.953	12785.9	972.953	972.953	4.35221	4.38444	4.35221	4123.43	2741.56	2741.56	4.38444	53.1974	2840.9	5	5	wscl non
C08	507.2	8	0.0157729	507.2	Snakes	0	0	Ptyas spp.	Carcass	Inside	Thong Pha Phum	Thong Pha Phum NP	3	1	3.21543	4	5.56328	4368.13	2085.22	13.2115	23.2625	2756	964	F2	Deciduous forest	F	1764.88	13382.3	1764.88	2928.11	19061.1	2928.11	2928.11	1.47965	9.65978	1.47965	5.06592	1690.87	1690.87	9.65978	1042.1	2041.16	1	1	wscl non
C09	980	5	0.00510204	980	Snakes	0	0	Ptyas spp.	Carcass	Inside	Thong Pha Phum	Thong Pha Phum NP	3	1	3.21543	4	5.56328	3510.71	1663.05	33.8569	23.9417	2832	857	F2	Deciduous forest	F	1506.93	14307.8	1506.93	1862.42	20091.9	1862.42	1862.42	5.72626	4.42345	4.42345	6.60084	1508.51	1508.51	4.42345	271.474	2727.24	1	1	wscl non
C14	36	3	0.0833333	36	Snakes	493	168	Ptyas spp.	Carcass	Inside	Si Sawat	Sri Nakarin NP	6	3	12.3762	9	12.5031	17464.6	4886.98	3.82619	24.1625	1703	781	A	Field crop	A	4795.4	16673.9	12194.4	1954.27	11650.9	1954.27	1954.27	1999.23	232.648	232.648	20294.5	6010.07	6010.07	232.648	428.176	8957.77	1	4	wscl non
C26	9261	9	0.000971817	9261	Snakes	1053	386	Ptyas spp.	Carcass	Inside	Si Sawat	Sri Nakarin NP	1	13	39.0004	13	16.9868	10716.4	16683	2.08722	26.9125	1446	202	A	Perennial crop	A	1327.69	9582.41	1389.33	1576.35	10732.5	1576.35	1576.35	21509.1	534.836	534.836	14812	66.9284	66.9284	534.836	42.0395	24762.7	1	4	wscl non
C30	123.5	1	0.00809717	123.5	Snakes	1319	522	Ptyas spp.	Carcass	Outside	Thong Pha Phum	Outside	21	1	3.59712	8	13.6519	1960.11	927.748	8.01746	26.6458	2621	175	U	Communication and utility	U	1753.39	1729.9	1753.39	1578.04	13813.2	1578.04	1578.04	4.01034	0.21746	0.21746	0.189503	492.071	492.071	0.21746	16.0078	857.9	3	4	wscl non
16	62.2	4	0.0643087	62.2	Birds	963	287	Pycnonotus aurigaster	Carcass	Outside	Sai Yok	Outside	11	3	6.68553	6	9.53137	14640.7	450.388	6.01347	26.3875	1658	270	U	Communication and utility	U	116.077	12429.9	116.077	466.663	12062.9	466.663	466.663	5.06648	4.8133	4.8133	4.79904	1389.27	1389.27	4.8133	46.018	1346.99	5	4	wscl non
009(cc)	131.2	2	0.0152439	131.2	Birds	687	300	Pycnonotus aurigaster	Carcass	Outside	Sai Yok	Outside	154	3	8.14708	4	4.60946	1214.9	73.5564	11.9202	27.5958	1315	43	U	Communication and utility	U	285.9	1269.14	285.9	1289.39	12753.1	1289.39	1289.39	2.04102	7.32328	2.04102	684.694	180.045	180.045	7.32328	56.5109	56.5109	1	5	wscl non
28	606	12	0.019802	606	Snakes	963	287	Rhabdophis subminiatus	Carcass	Outside	Sai Yok	Outside	8	4	8.50991	12	15.1031	3371.57	1258.67	7.60352	25.625	1691	354	A	Field crop	A	2412.16	10758.5	11338.5	1700.01	23138.4	1700.01	1700.01	0.153095	7595.39	0.153095	18533.3	7797.74	7797.74	7595.39	99.7609	5193.53	1	2	wscl
C10	199.8	3	0.015015	199.8	Snakes	1558	2602	Rhabdophis subminiatus	Carcass	Outside	Thong Pha Phum	Outside	3	1	3.21543	4	5.56328	1557.49	2018.47	8.76017	23.6792	2863	898	F1	Evergreen forest	F	167.256	16499.2	167.256	537.856	21887.5	537.856	537.856	13.018	1.86344	1.86344	0.118522	2446.48	2446.48	1.86344	442.431	4032.49	1	1	wscl non
U1	1.3	2	1.53846	1.3	Tadpoles	0	0	Rhacophorus bipunctatus	Tadpole	Inside	Thong Pha Phum	Thung Yai WS	9	8	24.9805	16	21.9847	16205.2	1464.4	3.02506	23.7	1587	877	F1	Evergreen forest	F	7746.91	35110	7746.91	15607.2	40590.6	15607.2	15607.2	54.6457	28022.6	54.6457	33363	4678.11	4678.11	28022.6	1297.37	25318.1	1	1	wscl
U2	1.2	1	0.833333	1.2	Tadpoles	0	0	Rhacophorus bipunctatus	Tadpole	Inside	Thong Pha Phum	Thung Yai WS	9	8	24.9805	16	21.9847	16205.2	1464.4	3.02506	23.7	1587	877	F1	Evergreen forest	F	7746.91	35110	7746.91	15607.2	40590.6	15607.2	15607.2	54.6457	28022.6	54.6457	33363	4678.11	4678.11	28022.6	1297.37	25318.1	1	1	wscl
U3	1.3	0	0	1.3	Tadpoles	0	0	Rhacophorus bipunctatus	Tadpole	Inside	Thong Pha Phum	Thung Yai WS	9	8	24.9805	16	21.9847	16205.2	1464.4	3.02506	23.7	1587	877	F1	Evergreen forest	F	7746.91	35110	7746.91	15607.2	40590.6	15607.2	15607.2	54.6457	28022.6	54.6457	33363	4678.11	4678.11	28022.6	1297.37	25318.1	1	1	wscl
U4	1.4	0	0	1.4	Tadpoles	0	0	Rhacophorus bipunctatus	Tadpole	Inside	Thong Pha Phum	Thung Yai WS	9	8	24.9805	16	21.9847	16205.2	1464.4	3.02506	23.7	1587	877	F1	Evergreen forest	F	7746.91	35110	7746.91	15607.2	40590.6	15607.2	15607.2	54.6457	28022.6	54.6457	33363	4678.11	4678.11	28022.6	1297.37	25318.1	1	1	wscl
U5	1	2	2	1	Tadpoles	0	0	Rhacophorus bipunctatus	Tadpole	Inside	Thong Pha Phum	Thung Yai WS	9	8	24.9805	16	21.9847	16205.2	1464.4	3.02506	23.7	1587	877	F1	Evergreen forest	F	7746.91	35110	7746.91	15607.2	40590.6	15607.2	15607.2	54.6457	28022.6	54.6457	33363	4678.11	4678.11	28022.6	1297.37	25318.1	1	1	wscl
C24	8.1	0	0	8.1	Reptiles	534	226	Scincidae	Carcass	Inside	Si Sawat	Erawan NP	21	6	23.9617	5	14.0331	10223.9	5949.98	12.1876	25.1	1559	431	F2	Deciduous forest	F	1553.93	20570.2	1553.93	3193.85	13670.8	3193.85	3193.85	3563.97	22.939	22.939	10610.3	3902.29	3902.29	22.939	97.7444	12912.5	3	3	wscl non
100	18.8	1	0.0531915	18.8	Birds	683	247	Siberian Rubythroat	Carcass	Inside	Si Sawat	Salakpra WS	4	2	5.61167	8	10.4058	8182.68	24195.1	9.61875	26.8083	1344	214	U	Communication and utility	U	851.897	9345.53	851.897	1622.09	14115.8	1622.09	1622.09	22285.7	3.72754	3.72754	3.74795	541.826	541.826	3.72754	213.043	28037	2	2	wscl
C44	135	5	0.037037	135	Snakes	5	1	Trimeresurus barati	Carcass	Inside	Sai Yok	Sai Yok NP	17	6	17.0082	15	21.1772	17277.5	4.25069	1.85433	25.55	2227	337	F2	Deciduous forest	F	16790.7	25068.3	17287	899.095	30702	899.095	899.095	22.9001	16804.6	22.9001	20950	78.8862	78.8862	16804.6	24.9514	24.9514	2	3	wscl non
C06	721.5	3	0.004158	721.5	Snakes	0	0	Trimeresurus kanburiensis	Carcass	Inside	Thong Pha Phum	Thong Pha Phum NP	3	1	3.21543	4	5.56328	4653.7	1514.14	7.49761	23.4042	2753	931	F2	Deciduous forest	F	1875.24	13139	1875.24	3393.25	18473.4	3393.25	3393.25	18.0774	295.661	18.0774	310.19	1227.81	1227.81	295.661	1461.34	1461.34	1	1	wscl
157	1134.5	1	0.000881446	1134.5	Reptiles	511	222	Varanus salvator	Carcass	Outside	Sai Yok	Outside	154	3	8.14708	4	4.60946	3057.84	223.774	2.6624	27.6167	1333	53	A	Perennial crop	A	711.006	1780.93	711.006	939.383	11811.7	939.383	939.383	4.09603	0.14777	0.14777	3412.98	1763.1	1763.1	0.14777	5.47651	1646.11	1	5	wscl non
14	104.7	1	0.0095511	104.7	Snakes	1365	496	Xenopeltis unicolor	Carcass	Outside	Sai Yok	Outside	154	3	8.14708	4	4.60946	5169.6	236.622	2.66282	27.1583	1350	169	A	Perennial crop	A	710.809	955.259	710.809	1154.89	11068.9	1154.89	1154.89	5.73801	1.62273	1.62273	1.61824	2103.27	2103.27	1.62273	2196.16	2308.09	1	4	wscl non
150	145.7	1	0.00686342	145.7	Snakes	586	168	Xenopeltis unicolor	Carcass	Outside	Thong Pha Phum	Outside	4	8	21.9907	8	11.1204	5041.39	186.906	1.3334	27.4292	2222	82	U	Communication and utility	U	1136.3	639.836	1409.58	586.247	22446.6	586.247	586.247	10.228	0.0172401	0.0172401	1346.48	624.218	624.218	0.0172401	237.654	237.654	5	4	wscl non
151	291.4	2	0.00686342	291.4	Snakes	1286	491	Xenopeltis unicolor	Carcass	Inside	Sai Yok	Sai Yok NP	7	1	3.37382	11	16.0537	15238.8	392.369	9.38453	27.0208	1898	180	A	Rangeland	A	1206.78	6848.09	1568.68	1997.06	19263	1997.06	1997.06	17.5483	29.2181	17.5483	29.1981	639.028	639.028	29.2181	241.264	383.038	2	4	wscl non
C43	177.4	2	0.011274	177.4	Snakes	5	1	Xenopeltis unicolor	Carcass	Inside	Sai Yok	Sai Yok NP	17	6	17.0082	15	21.1772	17269.2	13.9033	1.85433	25.55	2227	337	F2	Deciduous forest	F	16780.9	25058.1	17277.1	904.494	30698.5	904.494	904.494	13.8406	16794.8	13.8406	20940	89.1735	89.1735	16794.8	34.9707	34.9707	2	3	wscl non

## Sheet: Sheet2
ID	Group	species	Thai Name	Status	Order	Family	Types	Color	width-size	length-size	sizeclass	size	nMPs
C02	Reptiles	Acanthosaura lepidogaster	กิ้งก่าเขาเล็ก	LC	Squamata	Agamidae	-	-	-	-	-	-	0
026	Birds	Acridotheres grandis	นกเอี้ยงหงอน	LC	Passeriformes	Sturnidae	Fiber	Blue	13.76	948.4	G3	500-1000	1
026	Birds	Acridotheres grandis	นกเอี้ยงหงอน	LC	Passeriformes	Sturnidae	Fiber	Blue	11.09	1977.56	G4	1000-2000	1
026	Birds	Acridotheres grandis	นกเอี้ยงหงอน	LC	Passeriformes	Sturnidae	Fiber	Blue	15.29	5412.67	G8	>5000	1
047	Birds	Acridotheres grandis	นกเอี้ยงหงอน	LC	Passeriformes	Sturnidae	Fiber	Blue	23.33	2418.81	G5	2000-3000	1
158	Reptiles	Amyda cartilaginea	ตะพาบน้ำ	LC	Testudines	Trionychidae	Fiber	Blue	40.36	4199.05	G7	4000-5000	1
063	Birds	bird1	นก sp	LC	-	-	Fiber	Blue	22.55	2129.24	G5	2000-3000	1
063	Birds	bird1	นก sp	LC	-	-	Fiber	Blue	13.71	4607.61	G7	4000-5000	1
063	Birds	bird1	นก sp	LC	-	-	Fiber	Black	23.15	9448.27	G8	>5000	1
102	Birds	bird2	นก sp	LC	-	-	-	-	-	-	-	-	0
058	Snakes	Boiga siamensis	งูแส้หางม้าเทา	LC	Squamata	Colubridae	-	-	-	-	-	-	0
156	Snakes	Boiga siamensis	งูแส้หางม้าเทา	LC	Squamata	Colubridae	Fiber	Blue	27.78	425.25	G2	50-500	1
156	Snakes	Boiga siamensis	งูแส้หางม้าเทา	LC	Squamata	Colubridae	Fiber	Blue	42.36	683.54	G3	500-1000	1
115	Mammals	Callosciurus caniceps	กระรอกปลายหางดำ	LC	Rodentia	Sciuridae	Fiber	Red	26.66	137.14	G2	50-500	1
115	Mammals	Callosciurus caniceps	กระรอกปลายหางดำ	LC	Rodentia	Sciuridae	Fiber	Blue	20.61	949.59	G3	500-1000	1
045	Reptiles	Calotes versicolor	กิ้งก่าหัวแดง	LC	Squamata	Agamidae	Fiber	Green	21.42	1653.58	G4	1000-2000	1
034	Birds	Centropus sinensis	นกกะปูดใหญ่	LC	Cuculiformes	Cuculidae	Fiber	Blue	26.9	311.63	G2	50-500	1
034	Birds	Centropus sinensis	นกกะปูดใหญ่	LC	Cuculiformes	Cuculidae	Fiber	Blue	15.57	361.3	G2	50-500	1
034	Birds	Centropus sinensis	นกกะปูดใหญ่	LC	Cuculiformes	Cuculidae	Fiber	Blue	19.76	568.57	G3	500-1000	1
034	Birds	Centropus sinensis	นกกะปูดใหญ่	LC	Cuculiformes	Cuculidae	Fiber	Blue	23.26	1865.78	G4	1000-2000	1
055	Birds	Centropus sinensis	นกกะปูดใหญ่	LC	Cuculiformes	Cuculidae	Fiber	Blue	21.94	627.87	G3	500-1000	1
C01	Birds	Centropus sinensis	นกกะปูดใหญ่	LC	Cuculiformes	Cuculidae	Fragment	Transparency	375.25	688.22	G3	500-1000	1
046	Snakes	Chrysopelea ornata	งูเขียวพระอินทร์	LC	Squamata	Colubridae	Fiber	Black	28.66	2431.1	G5	2000-3000	1
C16	Snakes	Chrysopelea ornata	งูเขียวพระอินทร์	LC	Squamata	Colubridae	Fiber	Green	22.05	917.09	G3	500-1000	1
129 (1)	Tadpole	Clinotarus penelops	กบเขาสูง	LC	Anura	Ranidae	Fiber	Black	28.41	860.27	G3	500-1000	1
129 (1)	Tadpole	Clinotarus penelops	กบเขาสูง	LC	Anura	Ranidae	Fiber	Black	28.1	3684.25	G6	3000-4000	1
129 (2)	Tadpole	Clinotarus penelops	กบเขาสูง	LC	Anura	Ranidae	-	-	-	-	-	-	0
129 (3)	Tadpole	Clinotarus penelops	กบเขาสูง	LC	Anura	Ranidae	Fiber	Blue	35.28	1446.85	G4	1000-2000	1
129 (4)	Tadpole	Clinotarus penelops	กบเขาสูง	LC	Anura	Ranidae	Fiber	Black	36.29	722.05	G3	500-1000	1
129 (4)	Tadpole	Clinotarus penelops	กบเขาสูง	LC	Anura	Ranidae	Fiber	Black	18.99	821.94	G3	500-1000	1
129 (5)	Tadpole	Clinotarus penelops	กบเขาสูง	LC	Anura	Ranidae	Fiber	Black	20.5	1857.77	G4	1000-2000	1
134 (1)	Tadpole	Clinotarus penelops	กบเขาสูง	LC	Anura	Ranidae	-	-	-	-	-	-	0
134 (2)	Tadpole	Clinotarus penelops	กบเขาสูง	LC	Anura	Ranidae	Fiber	Blue	34.36	1278.25	G4	1000-2000	1
134 (2)	Tadpole	Clinotarus penelops	กบเขาสูง	LC	Anura	Ranidae	Fiber	Grey	34.29	2685.16	G5	2000-3000	1
134 (3)	Tadpole	Clinotarus penelops	กบเขาสูง	LC	Anura	Ranidae	Fiber	Black	18.78	1078.34	G4	1000-2000	1
134 (4)	Tadpole	Clinotarus penelops	กบเขาสูง	LC	Anura	Ranidae	-	-	-	-	-	-	0
134 (5)	Tadpole	Clinotarus penelops	กบเขาสูง	LC	Anura	Ranidae	Fiber	Black	60.23	103.51	G2	50-500	1
134 (5)	Tadpole	Clinotarus penelops	กบเขาสูง	LC	Anura	Ranidae	Fiber	Black	43.84	181.89	G2	50-500	1
134 (5)	Tadpole	Clinotarus penelops	กบเขาสูง	LC	Anura	Ranidae	Fiber	Black	41.42	745.08	G3	500-1000	1
134 (5)	Tadpole	Clinotarus penelops	กบเขาสูง	LC	Anura	Ranidae	Fiber	Black	29.7	751.17	G3	500-1000	1
134 (6)	Tadpole	Clinotarus penelops	กบเขาสูง	LC	Anura	Ranidae	-	-	-	-	-	-	0
137 (4)	Tadpole	Clinotarus penelops	กบเขาสูง	LC	Anura	Ranidae	Fiber	Blue	14.63	1410.11	G4	1000-2000	1
139 (1)	Tadpole	Clinotarus penelops	กบเขาสูง	LC	Anura	Ranidae	Fiber	Light blue	66.38	711.12	G3	500-1000	1
139 (2)	Tadpole	Clinotarus penelops	กบเขาสูง	LC	Anura	Ranidae	Foam	White	234.85	546.83	G3	500-1000	1
139 (3)	Tadpole	Clinotarus penelops	กบเขาสูง	LC	Anura	Ranidae	Fiber	Black	22.28	912.35	G3	500-1000	1
T001 (2)	Tadpole	Clinotarus penelops	กบเขาสูง	LC	Anura	Ranidae	Fragment	Transparency	470.44	1024.28	G4	1000-2000	1
T001 (3)	Tadpole	Clinotarus penelops	กบเขาสูง	LC	Anura	Ranidae	Fiber	Blue	32.72	1373.48	G4	1000-2000	1
T001 (4)	Tadpole	Clinotarus penelops	กบเขาสูง	LC	Anura	Ranidae	-	-	-	-	-	-	0
T001 (5)	Tadpole	Clinotarus penelops	กบเขาสูง	LC	Anura	Ranidae	Fiber	White	30.25	4582.47	G7	4000-5000	1
T001(1)	Tadpole	Clinotarus penelops	กบเขาสูง	LC	Anura	Ranidae	-	-	-	-	-	-	0
023	Snakes	Coelognathus radiatus	งูทางมะพร้าว	LC	Squamata	Colubridae	Fiber	Black	11.84	215.72	G2	50-500	1
023	Snakes	Coelognathus radiatus	งูทางมะพร้าว	LC	Squamata	Colubridae	Fiber	Black	11.48	520.71	G3	500-1000	1
023	Snakes	Coelognathus radiatus	งูทางมะพร้าว	LC	Squamata	Colubridae	Fiber	Black	10.41	581.34	G3	500-1000	1
023	Snakes	Coelognathus radiatus	งูทางมะพร้าว	LC	Squamata	Colubridae	Fiber	Black	13.72	1188.6	G4	1000-2000	1
023	Snakes	Coelognathus radiatus	งูทางมะพร้าว	LC	Squamata	Colubridae	Fiber	Black	26.63	1260.15	G4	1000-2000	1
023	Snakes	Coelognathus radiatus	งูทางมะพร้าว	LC	Squamata	Colubridae	Fiber	Blue	14.95	1135.79	G4	1000-2000	1
023	Snakes	Coelognathus radiatus	งูทางมะพร้าว	LC	Squamata	Colubridae	Fiber	Blue	13.37	1196.85	G4	1000-2000	1
023	Snakes	Coelognathus radiatus	งูทางมะพร้าว	LC	Squamata	Colubridae	Fiber	Black	16.62	3198.82	G6	3000-4000	1
023	Snakes	Coelognathus radiatus	งูทางมะพร้าว	LC	Squamata	Colubridae	Fiber	Black	13.21	7929.69	G8	>5000	1
148	Snakes	Coelognathus radiatus	งูทางมะพร้าว	LC	Squamata	Colubridae	Fiber	Blue	40.74	1231.91	G4	1000-2000	1
148	Snakes	Coelognathus radiatus	งูทางมะพร้าว	LC	Squamata	Colubridae	Fiber	Blue	12.49	1253.51	G4	1000-2000	1
152	Snakes	Coelognathus radiatus	งูทางมะพร้าว	LC	Squamata	Colubridae	Fiber	Blue	20.57	211.06	G2	50-500	1
152	Snakes	Coelognathus radiatus	งูทางมะพร้าว	LC	Squamata	Colubridae	Fiber	Blue	23.26	216.68	G2	50-500	1
152	Snakes	Coelognathus radiatus	งูทางมะพร้าว	LC	Squamata	Colubridae	Fiber	Blue	32.59	640.11	G3	500-1000	1
152	Snakes	Coelognathus radiatus	งูทางมะพร้าว	LC	Squamata	Colubridae	Fiber	Blue	27.82	660.63	G3	500-1000	1
152	Snakes	Coelognathus radiatus	งูทางมะพร้าว	LC	Squamata	Colubridae	Fiber	Blue	36.79	1028.55	G4	1000-2000	1
152	Snakes	Coelognathus radiatus	งูทางมะพร้าว	LC	Squamata	Colubridae	Fiber	Blue	38.49	1124.02	G4	1000-2000	1
152	Snakes	Coelognathus radiatus	งูทางมะพร้าว	LC	Squamata	Colubridae	Fiber	Blue	22.21	1373.13	G4	1000-2000	1
152	Snakes	Coelognathus radiatus	งูทางมะพร้าว	LC	Squamata	Colubridae	Fiber	Blue	25.29	1430.7	G4	1000-2000	1
152	Snakes	Coelognathus radiatus	งูทางมะพร้าว	LC	Squamata	Colubridae	Fiber	Blue	36.67	1447.81	G4	1000-2000	1
152	Snakes	Coelognathus radiatus	งูทางมะพร้าว	LC	Squamata	Colubridae	Fiber	Blue	39.14	1777.68	G4	1000-2000	1
C11	Snakes	Coelognathus radiatus	งูทางมะพร้าว	LC	Squamata	Colubridae	Fragment	Grey	178.17	317.52	G2	50-500	1
C11	Snakes	Coelognathus radiatus	งูทางมะพร้าว	LC	Squamata	Colubridae	Fragment	Brown	166.46	266.24	G2	50-500	1
C11	Snakes	Coelognathus radiatus	งูทางมะพร้าว	LC	Squamata	Colubridae	Fiber	Purple	7.85	267.61	G2	50-500	1
C11	Snakes	Coelognathus radiatus	งูทางมะพร้าว	LC	Squamata	Colubridae	Fragment	Transparency	175.02	255.01	G2	50-500	1
C11	Snakes	Coelognathus radiatus	งูทางมะพร้าว	LC	Squamata	Colubridae	Fiber	Black	56.17	667.39	G3	500-1000	1
C11	Snakes	Coelognathus radiatus	งูทางมะพร้าว	LC	Squamata	Colubridae	Fiber	Blue	15.82	575.85	G3	500-1000	1
C11	Snakes	Coelognathus radiatus	งูทางมะพร้าว	LC	Squamata	Colubridae	Fiber	Purple	27.38	604.04	G3	500-1000	1
C11	Snakes	Coelognathus radiatus	งูทางมะพร้าว	LC	Squamata	Colubridae	Fragment	Orange	654.2	660.01	G3	500-1000	1
C11	Snakes	Coelognathus radiatus	งูทางมะพร้าว	LC	Squamata	Colubridae	Fiber	Blue	23.42	3050.16	G6	3000-4000	1
C36	Snakes	Coelognathus radiatus	งูทางมะพร้าว	LC	Squamata	Colubridae	-	-	-	-	-	-	0
C38	Snakes	Coelognathus radiatus	งูทางมะพร้าว	LC	Squamata	Colubridae	Fiber	Grey	21.33	4752.98	G7	4000-5000	1
040	Birds	Copsychus saularis	นกกางเขนบ้าน	LC	Passeriformes	Muscicapidae	Fragment	Brown	75.03	78.48	G2	50-500	1
040	Birds	Copsychus saularis	นกกางเขนบ้าน	LC	Passeriformes	Muscicapidae	Fragment	Brown	77.39	91.26	G2	50-500	1
040	Birds	Copsychus saularis	นกกางเขนบ้าน	LC	Passeriformes	Muscicapidae	Fragment	Brown	99.52	108.76	G2	50-500	1
040	Birds	Copsychus saularis	นกกางเขนบ้าน	LC	Passeriformes	Muscicapidae	Fragment	Brown	111.03	159.08	G2	50-500	1
040	Birds	Copsychus saularis	นกกางเขนบ้าน	LC	Passeriformes	Muscicapidae	Fragment	Brown	205.8	238.48	G2	50-500	1
040	Birds	Copsychus saularis	นกกางเขนบ้าน	LC	Passeriformes	Muscicapidae	Fragment	Brown	193.56	265.81	G2	50-500	1
040	Birds	Copsychus saularis	นกกางเขนบ้าน	LC	Passeriformes	Muscicapidae	Fragment	Transparency	180.85	191.49	G2	50-500	1
040	Birds	Copsychus saularis	นกกางเขนบ้าน	LC	Passeriformes	Muscicapidae	Fragment	Yellow	55.86	94.04	G2	50-500	1
040	Birds	Copsychus saularis	นกกางเขนบ้าน	LC	Passeriformes	Muscicapidae	Fiber	Blue	20.59	930.89	G3	500-1000	1
040	Birds	Copsychus saularis	นกกางเขนบ้าน	LC	Passeriformes	Muscicapidae	Fiber	Light blue	7.11	551.44	G3	500-1000	1
040	Birds	Copsychus saularis	นกกางเขนบ้าน	LC	Passeriformes	Muscicapidae	Fiber	Blue	12.59	1377.05	G4	1000-2000	1
040	Birds	Copsychus saularis	นกกางเขนบ้าน	LC	Passeriformes	Muscicapidae	Fiber	Blue	10.99	1623.48	G4	1000-2000	1
040	Birds	Copsychus saularis	นกกางเขนบ้าน	LC	Passeriformes	Muscicapidae	Fiber	Blue	25.11	1675.72	G4	1000-2000	1
089	Birds	Coracias benghalensis	นกตะขาบทุ่ง	LC	Coraciiformes	Coraciidae	-	-	-	-	-	-	0
065	Snakes	Daboia siamensis	งูแมวเซา	LC	Squamata	Viperidae	Fiber	Black	51.01	427.57	G2	50-500	1
065	Snakes	Daboia siamensis	งูแมวเซา	LC	Squamata	Viperidae	Fiber	Black	56.2	834.71	G3	500-1000	1
065	Snakes	Daboia siamensis	งูแมวเซา	LC	Squamata	Viperidae	Fiber	Transparency	37.07	3305.51	G6	3000-4000	1
003	Snakes	Dendrelaphis spp.	งูสายม่าน	LC	Squamata	Colubridae	Fragment	White	165.01	360.35	G2	50-500	1
003	Snakes	Dendrelaphis spp.	งูสายม่าน	LC	Squamata	Colubridae	Fragment	White	185.07	370.01	G2	50-500	1
003	Snakes	Dendrelaphis spp.	งูสายม่าน	LC	Squamata	Colubridae	Fragment	White	198.66	527.57	G3	500-1000	1
003	Snakes	Dendrelaphis spp.	งูสายม่าน	LC	Squamata	Colubridae	Fiber	Blue	2.91	704.67	G3	500-1000	1
003	Snakes	Dendrelaphis spp.	งูสายม่าน	LC	Squamata	Colubridae	Fiber	Blue	12.17	1041.37	G4	1000-2000	1
003	Snakes	Dendrelaphis spp.	งูสายม่าน	LC	Squamata	Colubridae	Fiber	Blue	16.51	1262.16	G4	1000-2000	1
003	Snakes	Dendrelaphis spp.	งูสายม่าน	LC	Squamata	Colubridae	Fiber	Blue	9.35	1269.9	G4	1000-2000	1
003	Snakes	Dendrelaphis spp.	งูสายม่าน	LC	Squamata	Colubridae	Fiber	Blue	18.56	1417.85	G4	1000-2000	1
003	Snakes	Dendrelaphis spp.	งูสายม่าน	LC	Squamata	Colubridae	Fiber	Purple	22.02	1703.14	G4	1000-2000	1
003	Snakes	Dendrelaphis spp.	งูสายม่าน	LC	Squamata	Colubridae	Fiber	Blue	18.3	2200.01	G5	2000-3000	1
003	Snakes	Dendrelaphis spp.	งูสายม่าน	LC	Squamata	Colubridae	Fiber	Blue	10.42	3381.84	G6	3000-4000	1
052	Snakes	Dendrelaphis spp.	งูสายม่าน	LC	Squamata	Colubridae	Fiber	Blue	20.69	1697.56	G4	1000-2000	1
052	Snakes	Dendrelaphis spp.	งูสายม่าน	LC	Squamata	Colubridae	Fiber	Blue	23.28	1730.8	G4	1000-2000	1
C12	Snakes	Dendrelaphis spp.	งูสายม่าน	LC	Squamata	Colubridae	Fragment	Black	68.31	90.81	G2	50-500	1
C12	Snakes	Dendrelaphis spp.	งูสายม่าน	LC	Squamata	Colubridae	Fragment	Orange	82.09	101.5	G2	50-500	1
C12	Snakes	Dendrelaphis spp.	งูสายม่าน	LC	Squamata	Colubridae	Fragment	Transparency	354.48	375.23	G2	50-500	1
C12	Snakes	Dendrelaphis spp.	งูสายม่าน	LC	Squamata	Colubridae	Fiber	Black	38.93	985.53	G3	500-1000	1
C12	Snakes	Dendrelaphis spp.	งูสายม่าน	LC	Squamata	Colubridae	Fiber	Purple	26.72	877.69	G3	500-1000	1
C12	Snakes	Dendrelaphis spp.	งูสายม่าน	LC	Squamata	Colubridae	Fiber	Blue	14.08	2543.03	G5	2000-3000	1
C12	Snakes	Dendrelaphis spp.	งูสายม่าน	LC	Squamata	Colubridae	Fiber	Blue	23.68	3030.11	G6	3000-4000	1
149	Snakes	Dryocalamus davidsonii	งูปล้องฉนวนธรรมดา	LC	Squamata	Colubridae	Fiber	Light blue	93.74	174.86	G2	50-500	1
153	Snakes	Dryocalamus davidsonii	งูปล้องฉนวนธรรมดา	LC	Squamata	Colubridae	Fiber	Grey	22.76	2317.45	G5	2000-3000	1
C07	Snakes	Dryocalamus davidsonii	งูปล้องฉนวนธรรมดา	LC	Squamata	Colubridae	Fiber	Blue	8.04	1975.5	G4	1000-2000	1
C07	Snakes	Dryocalamus davidsonii	งูปล้องฉนวนธรรมดา	LC	Squamata	Colubridae	Fiber	Black	15.02	2588.02	G5	2000-3000	1
013	Amphibians	Duttaphrynus melanostictus	คางคกบ้าน	LC	Anura	Bufonidae	-	-	-	-	-	-	0
027	Amphibians	Duttaphrynus melanostictus	คางคกบ้าน	LC	Anura	Bufonidae	Fragment	Light blue	240.94	302.76	G2	50-500	1
027	Amphibians	Duttaphrynus melanostictus	คางคกบ้าน	LC	Anura	Bufonidae	Fiber	Black	18.77	991.94	G3	500-1000	1
027	Amphibians	Duttaphrynus melanostictus	คางคกบ้าน	LC	Anura	Bufonidae	Fiber	Blue	14.44	773.51	G3	500-1000	1
027	Amphibians	Duttaphrynus melanostictus	คางคกบ้าน	LC	Anura	Bufonidae	Fiber	Purple	17.99	1952	G4	1000-2000	1
048	Amphibians	Duttaphrynus melanostictus	คางคกบ้าน	LC	Anura	Bufonidae	Fiber	Blue	18.66	1933.04	G4	1000-2000	1
169(1)	Tadpole	Duttaphrynus melanostictus	คางคกบ้าน	LC	Anura	Bufonidae	Fiber	Blue	48.03	3150.95	G6	3000-4000	1
169(2)	Tadpole	Duttaphrynus melanostictus	คางคกบ้าน	LC	Anura	Bufonidae	-	-	-	-	-	-	0
169(3)	Tadpole	Duttaphrynus melanostictus	คางคกบ้าน	LC	Anura	Bufonidae	Fiber	Black	362.09	420.56	G2	50-500	1
169(3)	Tadpole	Duttaphrynus melanostictus	คางคกบ้าน	LC	Anura	Bufonidae	Fiber	Blue	30.96	1934.8	G4	1000-2000	1
169(3)	Tadpole	Duttaphrynus melanostictus	คางคกบ้าน	LC	Anura	Bufonidae	Fiber	Blue	31.1	2447.87	G5	2000-3000	1
C27	Amphibians	Duttaphrynus melanostictus	คางคกบ้าน	LC	Anura	Bufonidae	-	-	-	-	-	-	0
010(cc)	Amphibians	Fejervarya limnocharis	กบหนอง	LC	Anura	Dicroglossidae	Fragment	Black	32.01	43.46	G1	<50	1
010(cc)	Amphibians	Fejervarya limnocharis	กบหนอง	LC	Anura	Dicroglossidae	Film	Black	297.17	355.84	G2	50-500	1
010(cc)	Amphibians	Fejervarya limnocharis	กบหนอง	LC	Anura	Dicroglossidae	Fiber	Black	20	392.57	G2	50-500	1
010(cc)	Amphibians	Fejervarya limnocharis	กบหนอง	LC	Anura	Dicroglossidae	Fragment	White	115.36	169.48	G2	50-500	1
010(cc)	Amphibians	Fejervarya limnocharis	กบหนอง	LC	Anura	Dicroglossidae	Fragment	White	228.66	241.95	G2	50-500	1
010(cc)	Amphibians	Fejervarya limnocharis	กบหนอง	LC	Anura	Dicroglossidae	Fragment	Blue	29.59	61.28	G2	50-500	1
010(cc)	Amphibians	Fejervarya limnocharis	กบหนอง	LC	Anura	Dicroglossidae	Fiber	Blue	14.7	181.99	G2	50-500	1
010(cc)	Amphibians	Fejervarya limnocharis	กบหนอง	LC	Anura	Dicroglossidae	Fiber	Blue	7.43	306.83	G2	50-500	1
010(cc)	Amphibians	Fejervarya limnocharis	กบหนอง	LC	Anura	Dicroglossidae	Fiber	Blue	11.55	419.38	G2	50-500	1
010(cc)	Amphibians	Fejervarya limnocharis	กบหนอง	LC	Anura	Dicroglossidae	Fiber	Purple	10.8	282.01	G2	50-500	1
010(cc)	Amphibians	Fejervarya limnocharis	กบหนอง	LC	Anura	Dicroglossidae	Fiber	Purple	12.36	285.39	G2	50-500	1
010(cc)	Amphibians	Fejervarya limnocharis	กบหนอง	LC	Anura	Dicroglossidae	Fiber	Purple	18.67	463.91	G2	50-500	1
010(cc)	Amphibians	Fejervarya limnocharis	กบหนอง	LC	Anura	Dicroglossidae	Fragment	Orange	125.77	190.61	G2	50-500	1
010(cc)	Amphibians	Fejervarya limnocharis	กบหนอง	LC	Anura	Dicroglossidae	Fiber	Green	18.4	681.97	G3	500-1000	1
010(cc)	Amphibians	Fejervarya limnocharis	กบหนอง	LC	Anura	Dicroglossidae	Fiber	Blue	14.24	575.08	G3	500-1000	1
010(cc)	Amphibians	Fejervarya limnocharis	กบหนอง	LC	Anura	Dicroglossidae	Fiber	Blue	20.8	679.55	G3	500-1000	1
010(cc)	Amphibians	Fejervarya limnocharis	กบหนอง	LC	Anura	Dicroglossidae	Fiber	Blue	20.78	787.69	G3	500-1000	1
010(cc)	Amphibians	Fejervarya limnocharis	กบหนอง	LC	Anura	Dicroglossidae	Fiber	Blue	10.8	823.81	G3	500-1000	1
010(cc)	Amphibians	Fejervarya limnocharis	กบหนอง	LC	Anura	Dicroglossidae	Fiber	Blue	18.67	1159.72	G4	1000-2000	1
010(cc)	Amphibians	Fejervarya limnocharis	กบหนอง	LC	Anura	Dicroglossidae	Fiber	Blue	17.14	1808.69	G4	1000-2000	1
010(cc)	Amphibians	Fejervarya limnocharis	กบหนอง	LC	Anura	Dicroglossidae	Fiber	Blue	16.47	1846.79	G4	1000-2000	1
010(cc)	Amphibians	Fejervarya limnocharis	กบหนอง	LC	Anura	Dicroglossidae	Fiber	Black	27.13	5961.24	G8	>5000	1
081 (1)	Tadpole	Fejervarya limnocharis	กบหนอง	LC	Anura	Ranidae	-	-	-	-	-	-	0
081 (2)	Tadpole	Fejervarya limnocharis	กบหนอง	LC	Anura	Ranidae	-	-	-	-	-	-	0
081 (3)	Tadpole	Fejervarya limnocharis	กบหนอง	LC	Anura	Ranidae	-	-	-	-	-	-	0
FL1	Tadpole	Fejervarya limnocharis	กบหนอง	LC	Anura	Dicroglossidae	Fiber	Black	9.35	712.73	G3	500-1000	1
FL1	Tadpole	Fejervarya limnocharis	กบหนอง	LC	Anura	Dicroglossidae	Fiber	Purple	13.3	972.48	G3	500-1000	1
FL1	Tadpole	Fejervarya limnocharis	กบหนอง	LC	Anura	Dicroglossidae	Fiber	Blue	23.45	1164.39	G4	1000-2000	1
FL1	Tadpole	Fejervarya limnocharis	กบหนอง	LC	Anura	Dicroglossidae	Fiber	Blue	19.7	1193.75	G4	1000-2000	1
FL1	Tadpole	Fejervarya limnocharis	กบหนอง	LC	Anura	Dicroglossidae	Fiber	Blue	10.6	1268.69	G4	1000-2000	1
FL1	Tadpole	Fejervarya limnocharis	กบหนอง	LC	Anura	Dicroglossidae	Fiber	Blue	9.31	1291.46	G4	1000-2000	1
FL1	Tadpole	Fejervarya limnocharis	กบหนอง	LC	Anura	Dicroglossidae	Fiber	Blue	19.55	1491.72	G4	1000-2000	1
FL1	Tadpole	Fejervarya limnocharis	กบหนอง	LC	Anura	Dicroglossidae	Fiber	Grey	12.72	2429.18	G5	2000-3000	1
FL1	Tadpole	Fejervarya limnocharis	กบหนอง	LC	Anura	Dicroglossidae	Fiber	Red	24.69	3075.74	G6	3000-4000	1
FL2	Tadpole	Fejervarya limnocharis	กบหนอง	LC	Anura	Dicroglossidae	Fragment	White	62.92	78.65	G2	50-500	1
FL2	Tadpole	Fejervarya limnocharis	กบหนอง	LC	Anura	Dicroglossidae	Fragment	White	161.68	209.92	G2	50-500	1
FL2	Tadpole	Fejervarya limnocharis	กบหนอง	LC	Anura	Dicroglossidae	Fragment	White	155.55	219.69	G2	50-500	1
FL2	Tadpole	Fejervarya limnocharis	กบหนอง	LC	Anura	Dicroglossidae	Fragment	White	211.32	267.42	G2	50-500	1
FL2	Tadpole	Fejervarya limnocharis	กบหนอง	LC	Anura	Dicroglossidae	Fragment	White	217.12	367.98	G2	50-500	1
FL2	Tadpole	Fejervarya limnocharis	กบหนอง	LC	Anura	Dicroglossidae	Fragment	White	408.21	422.02	G2	50-500	1
FL2	Tadpole	Fejervarya limnocharis	กบหนอง	LC	Anura	Dicroglossidae	Fragment	White	198.42351.26	496.31	G2	50-500	1
FL2	Tadpole	Fejervarya limnocharis	กบหนอง	LC	Anura	Dicroglossidae	Fragment	Brown	127.03	172.45	G2	50-500	1
FL2	Tadpole	Fejervarya limnocharis	กบหนอง	LC	Anura	Dicroglossidae	Fragment	Brown	266.88	304.41	G2	50-500	1
FL2	Tadpole	Fejervarya limnocharis	กบหนอง	LC	Anura	Dicroglossidae	Fragment	Purple	90.47	128.74	G2	50-500	1
FL2	Tadpole	Fejervarya limnocharis	กบหนอง	LC	Anura	Dicroglossidae	Fiber	Purple	11.45	425.16	G2	50-500	1
FL2	Tadpole	Fejervarya limnocharis	กบหนอง	LC	Anura	Dicroglossidae	Fragment	Transparency	71.26	157.44	G2	50-500	1
FL2	Tadpole	Fejervarya limnocharis	กบหนอง	LC	Anura	Dicroglossidae	Fragment	Yellow	198.42	349.46	G2	50-500	1
FL2	Tadpole	Fejervarya limnocharis	กบหนอง	LC	Anura	Dicroglossidae	Fiber	Black	115.56	506.51	G3	500-1000	1
FL2	Tadpole	Fejervarya limnocharis	กบหนอง	LC	Anura	Dicroglossidae	Fiber	Blue	27.26	1437.77	G4	1000-2000	1
FL2	Tadpole	Fejervarya limnocharis	กบหนอง	LC	Anura	Dicroglossidae	Fiber	Blue	26.64	1689.16	G4	1000-2000	1
FL2	Tadpole	Fejervarya limnocharis	กบหนอง	LC	Anura	Dicroglossidae	Fiber	Blue	13.07	1736.45	G4	1000-2000	1
FL3	Tadpole	Fejervarya limnocharis	กบหนอง	LC	Anura	Dicroglossidae	Fiber	Blue	40.89	484.91	G2	50-500	1
FL3	Tadpole	Fejervarya limnocharis	กบหนอง	LC	Anura	Dicroglossidae	Fiber	Black	16.46	800.62	G3	500-1000	1
FL3	Tadpole	Fejervarya limnocharis	กบหนอง	LC	Anura	Dicroglossidae	Fiber	Blue	10.55	530.96	G3	500-1000	1
FL3	Tadpole	Fejervarya limnocharis	กบหนอง	LC	Anura	Dicroglossidae	Fiber	Blue	15	552.91	G3	500-1000	1
FL3	Tadpole	Fejervarya limnocharis	กบหนอง	LC	Anura	Dicroglossidae	Fiber	Blue	16.5	621.64	G3	500-1000	1
FL3	Tadpole	Fejervarya limnocharis	กบหนอง	LC	Anura	Dicroglossidae	Fiber	Blue	11.12	782.11	G3	500-1000	1
FL3	Tadpole	Fejervarya limnocharis	กบหนอง	LC	Anura	Dicroglossidae	Fiber	Grey	11.2	1969.32	G4	1000-2000	1
FL3	Tadpole	Fejervarya limnocharis	กบหนอง	LC	Anura	Dicroglossidae	Fiber	Blue	9.76	2260.33	G5	2000-3000	1
FL3	Tadpole	Fejervarya limnocharis	กบหนอง	LC	Anura	Dicroglossidae	Fiber	Orange	26.23	8889.46	G8	>5000	1
FL4	Tadpole	Fejervarya limnocharis	กบหนอง	LC	Anura	Dicroglossidae	Fragment	Green	248.72	268.89	G2	50-500	1
FL4	Tadpole	Fejervarya limnocharis	กบหนอง	LC	Anura	Dicroglossidae	Fragment	Brown	115.9	149.9	G2	50-500	1
FL4	Tadpole	Fejervarya limnocharis	กบหนอง	LC	Anura	Dicroglossidae	Fragment	Transparency	99.45	135.78	G2	50-500	1
FL4	Tadpole	Fejervarya limnocharis	กบหนอง	LC	Anura	Dicroglossidae	Fragment	Transparency	219.58	264.92	G2	50-500	1
FL4	Tadpole	Fejervarya limnocharis	กบหนอง	LC	Anura	Dicroglossidae	Fragment	Transparency	171.69	273.91	G2	50-500	1
FL4	Tadpole	Fejervarya limnocharis	กบหนอง	LC	Anura	Dicroglossidae	Fiber	Blue	14.49	1453.1	G4	1000-2000	1
FL5	Tadpole	Fejervarya limnocharis	กบหนอง	LC	Anura	Dicroglossidae	Fiber	Black	38.61	2504.01	G5	2000-3000	1
032	Reptiles	Gekko gecko	ตุ๊กแกบ้าน	LC	Squamata	Gekkonidae	Fiber	Blue	35.02	661.04	G3	500-1000	1
032	Reptiles	Gekko gecko	ตุ๊กแกบ้าน	LC	Squamata	Gekkonidae	Fiber	Blue	21.06	1034.31	G4	1000-2000	1
032	Reptiles	Gekko gecko	ตุ๊กแกบ้าน	LC	Squamata	Gekkonidae	Fiber	Blue	19.5	1561.74	G4	1000-2000	1
C20	Reptiles	Gekko gecko	ตุ๊กแกบ้าน	LC	Squamata	Gekkonidae	Fiber	Red	10.73	419.42	G2	50-500	1
C20	Reptiles	Gekko gecko	ตุ๊กแกบ้าน	LC	Squamata	Gekkonidae	Fiber	Purple	17.68	1461.55	G4	1000-2000	1
C20	Reptiles	Gekko gecko	ตุ๊กแกบ้าน	LC	Squamata	Gekkonidae	Fiber	Purple	17.18	3412.64	G6	3000-4000	1
039(2)	Birds	Glaucidium cuculoides	นกเค้าแมว	LC	Strigiformes	Strigidae	Fiber	Blue	19.32	1157.03	G4	1000-2000	1
015	Amphibians	Hoplobatrachus rugulosus	กบนา	LC	Anura	Dicroglossidae	Fiber	Blue	17.78	1945.14	G4	1000-2000	1
C39	Snakes	Hypsiscopus plumbea	งูปลิง	LC	Squamata	Homalopsidae	Fiber	Black	41.08	1239.91	G4	1000-2000	1
C39	Snakes	Hypsiscopus plumbea	งูปลิง	LC	Squamata	Homalopsidae	Fiber	Blue	34.58	3480.01	G6	3000-4000	1
154	Amphibians	Kaloula pulchra	อึ่งอ่างบ้าน	LC	Anura	Microhylidae	-	-	-	-	-	-	0
C34	Amphibians	Kaloula pulchra	อึ่งอ่างบ้าน	LC	Anura	Microhylidae	Fragment	Green	311.6	319.75	G2	50-500	1
C34	Amphibians	Kaloula pulchra	อึ่งอ่างบ้าน	LC	Anura	Microhylidae	Fragment	Red	141.53	170.75	G2	50-500	1
C34	Amphibians	Kaloula pulchra	อึ่งอ่างบ้าน	LC	Anura	Microhylidae	Fiber	Black	21.3	649.6	G3	500-1000	1
C34	Amphibians	Kaloula pulchra	อึ่งอ่างบ้าน	LC	Anura	Microhylidae	Fragment	Green	489.83	685.03	G3	500-1000	1
C34	Amphibians	Kaloula pulchra	อึ่งอ่างบ้าน	LC	Anura	Microhylidae	Fiber	Black	17.29	2139.34	G5	2000-3000	1
C34	Amphibians	Kaloula pulchra	อึ่งอ่างบ้าน	LC	Anura	Microhylidae	Fiber	Grey	25.28	5089.32	G8	>5000	1
137 (1)	Tadpole	Leptobrachium sp.	อึ่งกราย	LC	Anura	Megophryidae	-	-	-	-	-	-	0
137 (2)	Tadpole	Leptobrachium sp.	อึ่งกราย	LC	Anura	Megophryidae	Fiber	Black	27.32	1150.14	G4	1000-2000	1
137 (3)	Tadpole	Leptobrachium sp.	อึ่งกราย	LC	Anura	Megophryidae	Fiber	Blue	17.05	327.88	G2	50-500	1
137 (3)	Tadpole	Leptobrachium sp.	อึ่งกราย	LC	Anura	Megophryidae	Fiber	Grey	29.85	1690.31	G4	1000-2000	1
137 (3)	Tadpole	Leptobrachium sp.	อึ่งกราย	LC	Anura	Megophryidae	Fiber	Blue	24.82	2401.91	G5	2000-3000	1
036	Snakes	Lycodon capucinus	งูสร้อยเหลือง	LC	Squamata	Colubridae	Fiber	Red	48.29	341.19	G2	50-500	1
036	Snakes	Lycodon capucinus	งูสร้อยเหลือง	LC	Squamata	Colubridae	Fiber	Purple	21.96	1322.24	G4	1000-2000	1
C32	Snakes	Lycodon capucinus	งูสร้อยเหลือง	LC	Squamata	Colubridae	Fragment	Red	101.75	243.52	G2	50-500	1
C32	Snakes	Lycodon capucinus	งูสร้อยเหลือง	LC	Squamata	Colubridae	Fiber	Red	18.08	543.95	G3	500-1000	1
C32	Snakes	Lycodon capucinus	งูสร้อยเหลือง	LC	Squamata	Colubridae	Fiber	Blue	15.55	1675.85	G4	1000-2000	1
009 (1)	Tadpole	Microhyla berdmorei	อึ่งแม่หนาว	LC	Anura	Microhylidae	Fiber	Grey	10.28	1375.27	G4	1000-2000	1
009 (1)	Tadpole	Microhyla berdmorei	อึ่งแม่หนาว	LC	Anura	Microhylidae	Fiber	Black	14.58	2033.03	G5	2000-3000	1
009 (1)	Tadpole	Microhyla berdmorei	อึ่งแม่หนาว	LC	Anura	Microhylidae	Fiber	Blue	13.32	2796.65	G5	2000-3000	1
009 (2)	Tadpole	Microhyla berdmorei	อึ่งแม่หนาว	LC	Anura	Microhylidae	Fiber	Grey	54.21	831.08	G3	500-1000	1
009 (2)	Tadpole	Microhyla berdmorei	อึ่งแม่หนาว	LC	Anura	Microhylidae	Fiber	Transparency	28.39	528.79	G3	500-1000	1
009 (2)	Tadpole	Microhyla berdmorei	อึ่งแม่หนาว	LC	Anura	Microhylidae	Fiber	Black	40.37	1347.7	G4	1000-2000	1
009 (2)	Tadpole	Microhyla berdmorei	อึ่งแม่หนาว	LC	Anura	Microhylidae	Fiber	Transparency	38.56	2237.01	G5	2000-3000	1
010 (1)	Tadpole	Microhyla berdmorei	อึ่งแม่หนาว	LC	Anura	Microhylidae	Fiber	Grey	22.48	1831.43	G4	1000-2000	1
010 (2)	Tadpole	Microhyla berdmorei	อึ่งแม่หนาว	LC	Anura	Microhylidae	Fragment	Light blue	26.31	63.41	G2	50-500	1
010 (2)	Tadpole	Microhyla berdmorei	อึ่งแม่หนาว	LC	Anura	Microhylidae	Fiber	Black	41.51	911.75	G3	500-1000	1
010 (2)	Tadpole	Microhyla berdmorei	อึ่งแม่หนาว	LC	Anura	Microhylidae	Fiber	Green	36.23	1842.24	G4	1000-2000	1
010 (2)	Tadpole	Microhyla berdmorei	อึ่งแม่หนาว	LC	Anura	Microhylidae	Fiber	Black	7.63	2322.51	G5	2000-3000	1
010 (3)	Tadpole	Microhyla berdmorei	อึ่งแม่หนาว	LC	Anura	Microhylidae	Fiber	Blue	18.07	1054.12	G4	1000-2000	1
C41	Mammals	Mouse	หนู	LC	-	-	Fiber	Grey	27.03	3071.58	G6	3000-4000	1
C41	Mammals	Mouse	หนู	LC	-	-	Fiber	Grey	26.33	3477.91	G6	3000-4000	1
053	Snakes	Oligodon spp.	งูปี่แก้ว	LC	Squamata	Colubridae	Fiber	Blue	11.83	123.59	G2	50-500	1
053	Snakes	Oligodon spp.	งูปี่แก้ว	LC	Squamata	Colubridae	Fiber	Blue	28.32	270.74	G2	50-500	1
053	Snakes	Oligodon spp.	งูปี่แก้ว	LC	Squamata	Colubridae	Fiber	Blue	24.92	299.8	G2	50-500	1
053	Snakes	Oligodon spp.	งูปี่แก้ว	LC	Squamata	Colubridae	Fiber	Blue	36.86	339.49	G2	50-500	1
053	Snakes	Oligodon spp.	งูปี่แก้ว	LC	Squamata	Colubridae	Fiber	Purple	19	597.42	G3	500-1000	1
053	Snakes	Oligodon spp.	งูปี่แก้ว	LC	Squamata	Colubridae	Fiber	Blue	40.01	1099.15	G4	1000-2000	1
053	Snakes	Oligodon spp.	งูปี่แก้ว	LC	Squamata	Colubridae	Fiber	Blue	36.26	1167.61	G4	1000-2000	1
053	Snakes	Oligodon spp.	งูปี่แก้ว	LC	Squamata	Colubridae	Fiber	Blue	31.15	1625.09	G4	1000-2000	1
053	Snakes	Oligodon spp.	งูปี่แก้ว	LC	Squamata	Colubridae	Fiber	Blue	25.64	3041.04	G6	3000-4000	1
C37	Snakes	Oligodon spp.	งูปี่แก้ว	LC	Squamata	Colubridae	Fiber	Light blue	3.39	1464.82	G4	1000-2000	1
C40	Snakes	Oligodon spp.	งูปี่แก้ว	LC	Squamata	Colubridae	-	-	-	-	-	-	0
C42	Snakes	Oligodon spp.	งูปี่แก้ว	LC	Squamata	Colubridae	Fragment	Green	107.04	248.59	G2	50-500	1
C42	Snakes	Oligodon spp.	งูปี่แก้ว	LC	Squamata	Colubridae	Fiber	Black	21.69	610	G3	500-1000	1
C42	Snakes	Oligodon spp.	งูปี่แก้ว	LC	Squamata	Colubridae	Fiber	Red	15.64	2446.2	G5	2000-3000	1
064	Snakes	Oligodon taeniatus	งูงอดไทย	LC	Squamata	Colubridae	Fiber	Blue	27.16	1056.31	G4	1000-2000	1
C35	Snakes	Ophiophagus hannah	งูจงอาง juvenile	VU	Squamata	Elapidae	Fiber	Blue	49.83	1494.31	G4	1000-2000	1
008	Snakes	Pareas carinatus	งูกินทากเกล็ดสัน	LC	Squamata	Pareidae	Fiber	Blue	8.47	377.27	G2	50-500	1
008	Snakes	Pareas carinatus	งูกินทากเกล็ดสัน	LC	Squamata	Pareidae	Fiber	Blue	17.55	899.53	G3	500-1000	1
008	Snakes	Pareas carinatus	งูกินทากเกล็ดสัน	LC	Squamata	Pareidae	Fiber	Blue	11.5	1098.46	G4	1000-2000	1
008	Snakes	Pareas carinatus	งูกินทากเกล็ดสัน	LC	Squamata	Pareidae	Fiber	Blue	19.19	2215.65	G5	2000-3000	1
008	Snakes	Pareas carinatus	งูกินทากเกล็ดสัน	LC	Squamata	Pareidae	Fiber	Purple	26.23	2084.59	G5	2000-3000	1
008	Snakes	Pareas carinatus	งูกินทากเกล็ดสัน	LC	Squamata	Pareidae	Fiber	Blue	21.97	3835.34	G6	3000-4000	1
025	Snakes	Pareas carinatus	งูกินทากเกล็ดสัน	LC	Squamata	Pareidae	Fiber	Blue	17.77	134.3	G2	50-500	1
025	Snakes	Pareas carinatus	งูกินทากเกล็ดสัน	LC	Squamata	Pareidae	Fiber	Blue	21.51	811.13	G3	500-1000	1
025	Snakes	Pareas carinatus	งูกินทากเกล็ดสัน	LC	Squamata	Pareidae	Fiber	Blue	22.44	938.78	G3	500-1000	1
025	Snakes	Pareas carinatus	งูกินทากเกล็ดสัน	LC	Squamata	Pareidae	Fiber	Blue	23.1	1010.03	G4	1000-2000	1
025	Snakes	Pareas carinatus	งูกินทากเกล็ดสัน	LC	Squamata	Pareidae	Fiber	Blue	11.3	1779.05	G4	1000-2000	1
025	Snakes	Pareas carinatus	งูกินทากเกล็ดสัน	LC	Squamata	Pareidae	Fiber	Blue	20.13	2343.97	G5	2000-3000	1
025	Snakes	Pareas carinatus	งูกินทากเกล็ดสัน	LC	Squamata	Pareidae	Fiber	Blue	20.47	4087.81	G7	4000-5000	1
039	Snakes	Pareas carinatus	งูกินทากเกล็ดสัน	LC	Squamata	Pareidae	Fragment	Black	233.8	266.94	G2	50-500	1
039	Snakes	Pareas carinatus	งูกินทากเกล็ดสัน	LC	Squamata	Pareidae	Fragment	Grey	127.63	170.08	G2	50-500	1
039	Snakes	Pareas carinatus	งูกินทากเกล็ดสัน	LC	Squamata	Pareidae	Fragment	Brown	169.44	406.01	G2	50-500	1
039	Snakes	Pareas carinatus	งูกินทากเกล็ดสัน	LC	Squamata	Pareidae	Fragment	Transparency	396.15	612.5	G3	500-1000	1
039	Snakes	Pareas carinatus	งูกินทากเกล็ดสัน	LC	Squamata	Pareidae	Fiber	Blue	19.8	1175.4	G4	1000-2000	1
039	Snakes	Pareas carinatus	งูกินทากเกล็ดสัน	LC	Squamata	Pareidae	Fiber	Blue	27.38	3188.99	G6	3000-4000	1
039	Snakes	Pareas carinatus	งูกินทากเกล็ดสัน	LC	Squamata	Pareidae	Fiber	Blue	23.59	3487.8	G6	3000-4000	1
039	Snakes	Pareas carinatus	งูกินทากเกล็ดสัน	LC	Squamata	Pareidae	Fiber	Grey	49.89	4462.5	G7	4000-5000	1
039	Snakes	Pareas carinatus	งูกินทากเกล็ดสัน	LC	Squamata	Pareidae	Fiber	Blue	23.84	5151.76	G8	>5000	1
039	Snakes	Pareas carinatus	งูกินทากเกล็ดสัน	LC	Squamata	Pareidae	Fiber	Blue	29.96	8121.29	G8	>5000	1
095	Snakes	Pareas carinatus	งูกินทากเกล็ดสัน	LC	Squamata	Pareidae	-	-	-	-	-	-	0
101	Snakes	Pareas carinatus	งูกินทากเกล็ดสัน	LC	Squamata	Pareidae	Fiber	Red	24	794.42	G3	500-1000	1
101	Snakes	Pareas carinatus	งูกินทากเกล็ดสัน	LC	Squamata	Pareidae	Fiber	Black	31.48	1000.21	G4	1000-2000	1
101	Snakes	Pareas carinatus	งูกินทากเกล็ดสัน	LC	Squamata	Pareidae	Fiber	Purple	23.72	1383.84	G4	1000-2000	1
116	Snakes	Pareas carinatus	งูกินทากเกล็ดสัน	LC	Squamata	Pareidae	-	-	-	-	-	-	0
028(2)	Snakes	Pareas carinatus	งูกินทากเกล็ดสัน	LC	Squamata	Pareidae	Fiber	Blue	23.24	1155.21	G4	1000-2000	1
028(2)	Snakes	Pareas carinatus	งูกินทากเกล็ดสัน	LC	Squamata	Pareidae	Fiber	Blue	34.08	1201.54	G4	1000-2000	1
C04	Snakes	Pareas carinatus	งูกินทากเกล็ดสัน	LC	Squamata	Pareidae	Fragment	Transparency	294.23	528.88	G3	500-1000	1
C04	Snakes	Pareas carinatus	งูกินทากเกล็ดสัน	LC	Squamata	Pareidae	Fiber	White	90.29	2204.81	G5	2000-3000	1
C13	Snakes	Pareas carinatus	งูกินทากเกล็ดสัน	LC	Squamata	Pareidae	Fiber	White	44.33	676.28	G3	500-1000	1
C13	Snakes	Pareas carinatus	งูกินทากเกล็ดสัน	LC	Squamata	Pareidae	Foam	White	676.26	682.14	G3	500-1000	1
C13	Snakes	Pareas carinatus	งูกินทากเกล็ดสัน	LC	Squamata	Pareidae	Fiber	Blue	30.54	789.27	G3	500-1000	1
C13	Snakes	Pareas carinatus	งูกินทากเกล็ดสัน	LC	Squamata	Pareidae	Fiber	Blue	19.05	1369.14	G4	1000-2000	1
C13	Snakes	Pareas carinatus	งูกินทากเกล็ดสัน	LC	Squamata	Pareidae	Fiber	White	41.15	3029.69	G6	3000-4000	1
C15	Snakes	Pareas carinatus	งูกินทากเกล็ดสัน	LC	Squamata	Pareidae	Fragment	Transparency	183.99	227.15	G2	50-500	1
C15	Snakes	Pareas carinatus	งูกินทากเกล็ดสัน	LC	Squamata	Pareidae	Fiber	Blue	8.33	713.78	G3	500-1000	1
C17	Snakes	Pareas carinatus	งูกินทากเกล็ดสัน	LC	Squamata	Pareidae	Fragment	Red	185.93	203.14	G2	50-500	1
C17	Snakes	Pareas carinatus	งูกินทากเกล็ดสัน	LC	Squamata	Pareidae	Fragment	Orange	125.64	127.15	G2	50-500	1
C23	Snakes	Pareas carinatus	งูกินทากเกล็ดสัน	LC	Squamata	Pareidae	Fiber	Black	19.21	684.41	G3	500-1000	1
C23	Snakes	Pareas carinatus	งูกินทากเกล็ดสัน	LC	Squamata	Pareidae	Fiber	Blue	16.08	881.74	G3	500-1000	1
C33	Snakes	Pareas carinatus	งูกินทากเกล็ดสัน	LC	Squamata	Pareidae	Fiber	Black	13.28	382.41	G2	50-500	1
C33	Snakes	Pareas carinatus	งูกินทากเกล็ดสัน	LC	Squamata	Pareidae	Fragment	Red	124.44	223.26	G2	50-500	1
C33	Snakes	Pareas carinatus	งูกินทากเกล็ดสัน	LC	Squamata	Pareidae	Fragment	White	147.25	221.87	G2	50-500	1
C33	Snakes	Pareas carinatus	งูกินทากเกล็ดสัน	LC	Squamata	Pareidae	Fragment	White	213.53	266.03	G2	50-500	1
C33	Snakes	Pareas carinatus	งูกินทากเกล็ดสัน	LC	Squamata	Pareidae	Fragment	Light blue	185.27	202.55	G2	50-500	1
C33	Snakes	Pareas carinatus	งูกินทากเกล็ดสัน	LC	Squamata	Pareidae	Fragment	Yellow	197.15	204.23	G2	50-500	1
C33	Snakes	Pareas carinatus	งูกินทากเกล็ดสัน	LC	Squamata	Pareidae	Fragment	White	176.21	543.33	G3	500-1000	1
C33	Snakes	Pareas carinatus	งูกินทากเกล็ดสัน	LC	Squamata	Pareidae	Fiber	Light blue	30.22	907.22	G3	500-1000	1
C33	Snakes	Pareas carinatus	งูกินทากเกล็ดสัน	LC	Squamata	Pareidae	Fiber	Black	22.38	1275.57	G4	1000-2000	1
C03	Snakes	Pareas margaritophorus	งูกินทากจุดขาว	LC	Squamata	Pareidae	Fragment	White	86.45	132.64	G2	50-500	1
C03	Snakes	Pareas margaritophorus	งูกินทากจุดขาว	LC	Squamata	Pareidae	Fragment	White	166.83	202.69	G2	50-500	1
C03	Snakes	Pareas margaritophorus	งูกินทากจุดขาว	LC	Squamata	Pareidae	Fragment	Orange	98.38	102.02	G2	50-500	1
C03	Snakes	Pareas margaritophorus	งูกินทากจุดขาว	LC	Squamata	Pareidae	Fragment	Yellow	105.86	129.4	G2	50-500	1
C03	Snakes	Pareas margaritophorus	งูกินทากจุดขาว	LC	Squamata	Pareidae	Fragment	Yellow	141.43	190.92	G2	50-500	1
C03	Snakes	Pareas margaritophorus	งูกินทากจุดขาว	LC	Squamata	Pareidae	Fiber	Black	20.98	1264.05	G4	1000-2000	1
C18	Snakes	Pareas margaritophorus	งูกินทากจุดขาว	LC	Squamata	Pareidae	Fiber	Blue	21.2	1294.83	G4	1000-2000	1
C18	Snakes	Pareas margaritophorus	งูกินทากจุดขาว	LC	Squamata	Pareidae	Fiber	Blue	12.38	1819.36	G4	1000-2000	1
C28	Snakes	Pareas margaritophorus	งูกินทากจุดขาว	LC	Squamata	Pareidae	Fiber	Blue	13.75	432.8	G2	50-500	1
C28	Snakes	Pareas margaritophorus	งูกินทากจุดขาว	LC	Squamata	Pareidae	Fragment	Light blue	61.53	103.59	G2	50-500	1
C28	Snakes	Pareas margaritophorus	งูกินทากจุดขาว	LC	Squamata	Pareidae	Fiber	Purple	48.84	5439.97	G8	>5000	1
C31	Snakes	Pareas margaritophorus	งูกินทากจุดขาว	LC	Squamata	Pareidae	Fiber	White	37.69	3494.04	G6	3000-4000	1
C31	Snakes	Pareas margaritophorus	งูกินทากจุดขาว	LC	Squamata	Pareidae	Fiber	White	47.57	3941.96	G6	3000-4000	1
C19	Birds	Passer montanus	นกระจอกบ้าน	LC	Passeriformes	Passeridae	Fragment	Black	105.08	125.21	G2	50-500	1
C19	Birds	Passer montanus	นกระจอกบ้าน	LC	Passeriformes	Passeridae	Fragment	Red	40.16	59.78	G2	50-500	1
C19	Birds	Passer montanus	นกระจอกบ้าน	LC	Passeriformes	Passeridae	Fragment	Red	96.64	116.39	G2	50-500	1
C19	Birds	Passer montanus	นกระจอกบ้าน	LC	Passeriformes	Passeridae	Fragment	Red	114.73	163.35	G2	50-500	1
C19	Birds	Passer montanus	นกระจอกบ้าน	LC	Passeriformes	Passeridae	Fiber	Blue	17.16	1277.79	G4	1000-2000	1
C21	Birds	Phylloscopus inornatus	นกกระจิ๊ด	LC	Passeriformes	Phylloscopidae	Fiber	Black	27.42	399.61	G2	50-500	1
C21	Birds	Phylloscopus inornatus	นกกระจิ๊ด	LC	Passeriformes	Phylloscopidae	Fiber	Black	41.56	2659.9	G5	2000-3000	1
C05	Snakes	Plagiopholis nuchalis	งูหัวลายลูกศร	LC	Squamata	Pseudoxenodontidae	Fragment	Transparency	177.25	251.39	G2	50-500	1
C05	Snakes	Plagiopholis nuchalis	งูหัวลายลูกศร	LC	Squamata	Pseudoxenodontidae	Fiber	Blue	23.5	1238.4	G4	1000-2000	1
155	Snakes	Ptyas mucosa	งูสิงหางลาย	LC	Squamata	Colubridae	Fiber	Blue	25.07	209.7	G2	50-500	1
155	Snakes	Ptyas mucosa	งูสิงหางลาย	LC	Squamata	Colubridae	Fragment	Light blue	93.91	106.71	G2	50-500	1
155	Snakes	Ptyas mucosa	งูสิงหางลาย	LC	Squamata	Colubridae	Fiber	Black	36.86	1806.38	G4	1000-2000	1
155	Snakes	Ptyas mucosa	งูสิงหางลาย	LC	Squamata	Colubridae	Fiber	Light blue	40.36	3197.85	G6	3000-4000	1
011	Snakes	Ptyas spp.	งูสิง	LC	Squamata	Colubridae	Fiber	Blue	19	1093.57	G4	1000-2000	1
011	Snakes	Ptyas spp.	งูสิง	LC	Squamata	Colubridae	Fiber	Blue	14.73	2306.36	G5	2000-3000	1
037	Snakes	Ptyas spp.	งูสิง	LC	Squamata	Colubridae	Fiber	Blue	10.03	1485.43	G4	1000-2000	1
C08	Snakes	Ptyas spp.	งูสิง	LC	Squamata	Colubridae	Fragment	Black	196.74	259.67	G2	50-500	1
C08	Snakes	Ptyas spp.	งูสิง	LC	Squamata	Colubridae	Fragment	Green	110.23	138.02	G2	50-500	1
C08	Snakes	Ptyas spp.	งูสิง	LC	Squamata	Colubridae	Fragment	White	348.65	350.32	G2	50-500	1
C08	Snakes	Ptyas spp.	งูสิง	LC	Squamata	Colubridae	Fragment	Brown	260.08	296.93	G2	50-500	1
C08	Snakes	Ptyas spp.	งูสิง	LC	Squamata	Colubridae	Fragment	White	629.05	717.28	G3	500-1000	1
C08	Snakes	Ptyas spp.	งูสิง	LC	Squamata	Colubridae	Fiber	Blue	19.11	880.75	G3	500-1000	1
C08	Snakes	Ptyas spp.	งูสิง	LC	Squamata	Colubridae	Fiber	Light blue	19.28	884.63	G3	500-1000	1
C08	Snakes	Ptyas spp.	งูสิง	LC	Squamata	Colubridae	Fiber	Black	28.32	4790.77	G7	4000-5000	1
C09	Snakes	Ptyas spp.	งูสิง	LC	Squamata	Colubridae	Fiber	Black	18.9	442.74	G2	50-500	1
C09	Snakes	Ptyas spp.	งูสิง	LC	Squamata	Colubridae	Fiber	Blue	15.25	720.14	G3	500-1000	1
C09	Snakes	Ptyas spp.	งูสิง	LC	Squamata	Colubridae	Fiber	Black	25.08	1729.35	G4	1000-2000	1
C09	Snakes	Ptyas spp.	งูสิง	LC	Squamata	Colubridae	Fiber	Grey	28.05	1125.21	G4	1000-2000	1
C09	Snakes	Ptyas spp.	งูสิง	LC	Squamata	Colubridae	Fiber	Grey	39.2	2093.2	G5	2000-3000	1
C14	Snakes	Ptyas spp.	งูสิง	LC	Squamata	Colubridae	Fiber	Blue	16.9	358.39	G2	50-500	1
C14	Snakes	Ptyas spp.	งูสิง	LC	Squamata	Colubridae	Fragment	Light blue	60.59	80.81	G2	50-500	1
C14	Snakes	Ptyas spp.	งูสิง	LC	Squamata	Colubridae	Fiber	Purple	16.01	981.91	G3	500-1000	1
C26	Snakes	Ptyas spp.	งูสิง	LC	Squamata	Colubridae	Fiber	Black	22.67	405.95	G2	50-500	1
C26	Snakes	Ptyas spp.	งูสิง	LC	Squamata	Colubridae	Fiber	Black	25.78	569.44	G3	500-1000	1
C26	Snakes	Ptyas spp.	งูสิง	LC	Squamata	Colubridae	Fiber	Black	19.94	654.54	G3	500-1000	1
C26	Snakes	Ptyas spp.	งูสิง	LC	Squamata	Colubridae	Fiber	Black	16.83	830.73	G3	500-1000	1
C26	Snakes	Ptyas spp.	งูสิง	LC	Squamata	Colubridae	Fiber	Brown	28.14	896.26	G3	500-1000	1
C26	Snakes	Ptyas spp.	งูสิง	LC	Squamata	Colubridae	Fiber	Black	15.29	1021.36	G4	1000-2000	1
C26	Snakes	Ptyas spp.	งูสิง	LC	Squamata	Colubridae	Fiber	Black	15.93	1195.98	G4	1000-2000	1
C26	Snakes	Ptyas spp.	งูสิง	LC	Squamata	Colubridae	Fiber	Black	15.46	1484.46	G4	1000-2000	1
C26	Snakes	Ptyas spp.	งูสิง	LC	Squamata	Colubridae	Fiber	Blue	15.66	1712.13	G4	1000-2000	1
C30	Snakes	Ptyas spp.	งูสิง	LC	Squamata	Colubridae	Fiber	Blue	14.41	3337.98	G6	3000-4000	1
016	Birds	Pycnonotus aurigaster	นกปรอดหัวสีเขม่า	LC	Passeriformes	Pycnonotidae	Fiber	Blue	14.23	167.52	G2	50-500	1
016	Birds	Pycnonotus aurigaster	นกปรอดหัวสีเขม่า	LC	Passeriformes	Pycnonotidae	Fiber	Black	9.9	517.39	G3	500-1000	1
016	Birds	Pycnonotus aurigaster	นกปรอดหัวสีเขม่า	LC	Passeriformes	Pycnonotidae	Fiber	Blue	26.08	962.95	G3	500-1000	1
016	Birds	Pycnonotus aurigaster	นกปรอดหัวสีเขม่า	LC	Passeriformes	Pycnonotidae	Fiber	Purple	12.51	613.41	G3	500-1000	1
009(cc)	Birds	Pycnonotus aurigaster	นกปรอดหัวสีเขม่า	LC	Anura	Pycnonotidae	Fiber	Black	16.31	1244.35	G4	1000-2000	1
009(cc)	Birds	Pycnonotus aurigaster	นกปรอดหัวสีเขม่า	LC	Anura	Pycnonotidae	Fiber	Black	14.22	1687.1	G4	1000-2000	1
028	Snakes	Rhabdophis subminiatus	งูลายสาบคอแดง	LC	Squamata	Natricidae	Fragment	Red	57.75	61.45	G2	50-500	1
028	Snakes	Rhabdophis subminiatus	งูลายสาบคอแดง	LC	Squamata	Natricidae	Fragment	Red	82.18	73.97	G2	50-500	1
028	Snakes	Rhabdophis subminiatus	งูลายสาบคอแดง	LC	Squamata	Natricidae	Fiber	Blue	22.2	501.46	G3	500-1000	1
028	Snakes	Rhabdophis subminiatus	งูลายสาบคอแดง	LC	Squamata	Natricidae	Fiber	Blue	25.79	938.71	G3	500-1000	1
028	Snakes	Rhabdophis subminiatus	งูลายสาบคอแดง	LC	Squamata	Natricidae	Fiber	Blue	21.7	1196.34	G4	1000-2000	1
028	Snakes	Rhabdophis subminiatus	งูลายสาบคอแดง	LC	Squamata	Natricidae	Fiber	Blue	17.48	1568.41	G4	1000-2000	1
028	Snakes	Rhabdophis subminiatus	งูลายสาบคอแดง	LC	Squamata	Natricidae	Fiber	Blue	11.88	1590.19	G4	1000-2000	1
028	Snakes	Rhabdophis subminiatus	งูลายสาบคอแดง	LC	Squamata	Natricidae	Fiber	Blue	12.87	1620.61	G4	1000-2000	1
028	Snakes	Rhabdophis subminiatus	งูลายสาบคอแดง	LC	Squamata	Natricidae	Fiber	Purple	9.1	1426.83	G4	1000-2000	1
028	Snakes	Rhabdophis subminiatus	งูลายสาบคอแดง	LC	Squamata	Natricidae	Fiber	Blue	17.03	2224.21	G5	2000-3000	1
028	Snakes	Rhabdophis subminiatus	งูลายสาบคอแดง	LC	Squamata	Natricidae	Fiber	Blue	17.49	2318.04	G5	2000-3000	1
028	Snakes	Rhabdophis subminiatus	งูลายสาบคอแดง	LC	Squamata	Natricidae	Fiber	Blue	15.46	2486.16	G5	2000-3000	1
C10	Snakes	Rhabdophis subminiatus	งูลายสาบคอแดง	LC	Squamata	Natricidae	Fiber	Blue	24.32	192.95	G2	50-500	1
C10	Snakes	Rhabdophis subminiatus	งูลายสาบคอแดง	LC	Squamata	Natricidae	Fiber	Blue	66.47	514.83	G3	500-1000	1
C10	Snakes	Rhabdophis subminiatus	งูลายสาบคอแดง	LC	Squamata	Natricidae	Fiber	Purple	17.48	1401.65	G4	1000-2000	1
U1	Tadpole	Rhacophorus bipunctatus	ปาดตีนเหลือง	LC	Anura	Rhacophoridae	Fiber	Black	17.97	805.4	G3	500-1000	1
U1	Tadpole	Rhacophorus bipunctatus	ปาดตีนเหลือง	LC	Anura	Rhacophoridae	Fiber	Black	51.14	938.12	G3	500-1000	1
U2	Tadpole	Rhacophorus bipunctatus	ปาดตีนเหลือง	LC	Anura	Rhacophoridae	Fiber	Black	38.87	3640.81	G6	3000-4000	1
U3	Tadpole	Rhacophorus bipunctatus	ปาดตีนเหลือง	LC	Anura	Rhacophoridae	-	-	-	-	-	-	0
U4	Tadpole	Rhacophorus bipunctatus	ปาดตีนเหลือง	LC	Anura	Rhacophoridae	-	-	-	-	-	-	0
U5	Tadpole	Rhacophorus bipunctatus	ปาดตีนเหลือง	LC	Anura	Rhacophoridae	Fiber	Black	21.41	1959.19	G4	1000-2000	1
U5	Tadpole	Rhacophorus bipunctatus	ปาดตีนเหลือง	LC	Anura	Rhacophoridae	Fiber	Black	29.15	2536.77	G5	2000-3000	1
C24	Reptiles	Scincidae	จิ้งเหลน	-	Squamata	Scincidae	-	-	-	-	-	-	0
100	Birds	Siberian Rubythroat	นกคอทับทิม	LC	Passeriformes	Muscicapidae	Fiber	Black	37.04	1393.66	G4	1000-2000	1
C44	Snakes	Trimeresurus barati	งูเขียวหางไหม้	LC	Squamata	Viperidae	Fiber	Blue	41	1426.67	G4	1000-2000	1
C44	Snakes	Trimeresurus barati	งูเขียวหางไหม้	LC	Squamata	Viperidae	Fiber	Blue	31.41	1619.59	G4	1000-2000	1
C44	Snakes	Trimeresurus barati	งูเขียวหางไหม้	LC	Squamata	Viperidae	Fiber	Blue	42.66	3293.25	G6	3000-4000	1
C44	Snakes	Trimeresurus barati	งูเขียวหางไหม้	LC	Squamata	Viperidae	Fiber	Blue	32.68	3395.08	G6	3000-4000	1
C44	Snakes	Trimeresurus barati	งูเขียวหางไหม้	LC	Squamata	Viperidae	Fiber	White	199.1	5050.8	G8	>5000	1
C06	Snakes	Trimeresurus kanburiensis	งูหางแฮ่มภูเขา	EN	Squamata	Viperidae	Fiber	Black	23.39	788.72	G3	500-1000	1
C06	Snakes	Trimeresurus kanburiensis	งูหางแฮ่มภูเขา	EN	Squamata	Viperidae	Fiber	Blue	13.83	1002.66	G4	1000-2000	1
C06	Snakes	Trimeresurus kanburiensis	งูหางแฮ่มภูเขา	EN	Squamata	Viperidae	Fiber	Blue	23.88	5045.43	G8	>5000	1
157	Reptiles	Varanus salvator	เหี้ย	LC	Squamata	Varanidae	Fiber	Blue	24.26	1845.69	G4	1000-2000	1
014	Snakes	Xenopeltis unicolor	งูแสงอาทิตย์	LC	Squamata	Xenopeltidae	Fiber	Blue	20.12	4150.51	G7	4000-5000	1
150	Snakes	Xenopeltis unicolor	งูแสงอาทิตย์	LC	Squamata	Xenopeltidae	Fragment	Yellow	149.24	167.59	G2	50-500	1
151	Snakes	Xenopeltis unicolor	งูแสงอาทิตย์	LC	Squamata	Xenopeltidae	Fragment	White	90.5	176.17	G2	50-500	1
151	Snakes	Xenopeltis unicolor	งูแสงอาทิตย์	LC	Squamata	Xenopeltidae	Fiber	Blue	10.44	2593.23	G5	2000-3000	1
C43	Snakes	Xenopeltis unicolor	งูแสงอาทิตย์	LC	Squamata	Xenopeltidae	Fragment	Light blue	108.21	130.51	G2	50-500	1
C43	Snakes	Xenopeltis unicolor	งูแสงอาทิตย์	LC	Squamata	Xenopeltidae	Fiber	White	49.06	3420.23	G6	3000-4000	1
